# Supplementary material for: Induced fac–mer rearrangements in {M(CO)3}+ complexes (M = Re, 99(m)Tc) by a PNP ligand
Source: Royal Society of Chemistry journal article supplement (doi:10.1039/d3dt03992g), 2024-01-01
Supplement: d3dt03992g1.pdf [file d3dt03992g1.pdf]

## Supporting Information

# Induced *fac-mer* rearrangements in $\{M(\text{CO})_3\}^+$ complexes ( $M = \text{Re}, {}^{99\text{m}}\text{Tc}$ ) by a PNP ligand

Manuel Luca Besmer,<sup>\*a</sup> Flurina Schwitter,<sup>a</sup> Federica Battistin,<sup>a</sup> Henrik Braband,<sup>a</sup> Thomas Fox,<sup>a</sup> Bernhard Spingler<sup>a</sup> and Roger Alberto<sup>a</sup>

<sup>a</sup>Department of Chemistry, University of Zurich, Winterthurerstrasse 190, CH-8057 Zurich, Switzerland

E-mail: manuel.besmer@chem.uzh.ch

## Table of Contents

|                                                                                                                        |    |
|------------------------------------------------------------------------------------------------------------------------|----|
| 1 General Experimental Details.....                                                                                    | 3  |
| 2. Remarks on NMR spectroscopy with <sup>99</sup> Tc complexes .....                                                   | 4  |
| 3 Experimental Procedures and Data.....                                                                                | 5  |
| 3.1 <i>mer</i> -[Re( <sup>Pyr</sup> PNP <sup>t</sup> Bu)(CO) <sub>3</sub> ] <sup>+</sup> , [3](PF <sub>6</sub> ).....  | 5  |
| 3.2 <i>mer</i> -[Re( <sup>Pyr</sup> PNP <sup>t</sup> Bu)(CO) <sub>3</sub> ] <sup>+</sup> , [3](BF <sub>4</sub> ) ..... | 5  |
| 3.3 <i>mer</i> -[Tc( <sup>Pyr</sup> PNP <sup>t</sup> Bu)(CO) <sub>3</sub> ] <sup>+</sup> , [5](PF <sub>6</sub> ) ..... | 6  |
| 3.4 <i>mer</i> -[ <sup>99m</sup> Tc( <sup>Pyr</sup> PNP <sup>t</sup> Bu)(CO) <sub>3</sub> ], [7] <sup>+</sup> .....    | 6  |
| 3.5 <i>fac</i> -[Re(κ <sup>2</sup> -terpy)(CO) <sub>3</sub> (PO <sub>2</sub> F <sub>2</sub> )], [9].....               | 7  |
| 3.6 <i>fac</i> -[Re(κ <sup>2</sup> -terpy)(CO) <sub>3</sub> Br], [10].....                                             | 8  |
| 3.7 <i>fac</i> -[Tc(κ <sup>2</sup> -terpy)(CO) <sub>3</sub> Cl], [11].....                                             | 8  |
| 3.8 Fluxional behaviour of <i>fac</i> -[Tc(κ <sup>2</sup> -terpy)(CO) <sub>3</sub> Cl], [11] .....                     | 9  |
| 4 Spectra .....                                                                                                        | 10 |
| 4.1 <i>mer</i> -[Re( <sup>Pyr</sup> PNP <sup>t</sup> Bu)(CO) <sub>3</sub> ] <sup>+</sup> , [3](PF <sub>6</sub> ).....  | 10 |
| 4.2 <i>mer</i> -[Re( <sup>Pyr</sup> PNP <sup>t</sup> Bu)(CO) <sub>3</sub> ] <sup>+</sup> , [3](BF <sub>4</sub> ) ..... | 14 |
| 4.3 <i>mer</i> -[Tc( <sup>Pyr</sup> PNP <sup>t</sup> Bu)(CO) <sub>3</sub> ] <sup>+</sup> , [5](PF <sub>6</sub> ).....  | 15 |
| 4.4 <i>mer</i> -[ <sup>99m</sup> Tc( <sup>Pyr</sup> PNP <sup>t</sup> Bu)(CO) <sub>3</sub> ], [7] <sup>+</sup> .....    | 20 |
| 4.5 <i>fac</i> -[Re(κ <sup>2</sup> -terpy)(CO) <sub>3</sub> (PO <sub>2</sub> F <sub>2</sub> )], [9].....               | 22 |
| 4.6 <i>fac</i> -[Re(κ <sup>2</sup> -terpy)(CO) <sub>3</sub> Br], [10].....                                             | 24 |
| 4.7 <i>fac</i> -[Tc(κ <sup>2</sup> -terpy)(CO) <sub>3</sub> Cl], [11].....                                             | 25 |
| 5 Crystallographic Data .....                                                                                          | 28 |
| 5.1 2,6-bis((di-tertbutylphosphino)methyl)pyridine ( <sup>Pyr</sup> PNP <sup>t</sup> Bu) (2).....                      | 28 |
| 5.2 <i>mer</i> -[Re( <sup>Pyr</sup> PNP <sup>t</sup> Bu)(CO) <sub>3</sub> ] <sup>+</sup> , [3](PF <sub>6</sub> ).....  | 30 |
| 5.3 <i>mer</i> -[Re( <sup>Pyr</sup> PNP <sup>t</sup> Bu)(CO) <sub>3</sub> ] <sup>+</sup> , [3](BF <sub>4</sub> ) ..... | 32 |
| 5.4 <i>mer</i> -[Tc( <sup>Pyr</sup> PNP <sup>t</sup> Bu)(CO) <sub>3</sub> ] <sup>+</sup> , [5](PF <sub>6</sub> ).....  | 34 |
| 5.5 <i>fac</i> -[Re(κ <sup>2</sup> -terpy)(CO) <sub>3</sub> (PO <sub>2</sub> F <sub>2</sub> )], [9].....               | 36 |
| 5.6 <i>fac</i> -[Tc(κ <sup>2</sup> -terpy)(CO) <sub>3</sub> Cl], [11].....                                             | 38 |

6. References .....40

## 1 General Experimental Details

**Materials:** Unless otherwise stated, all chemicals were of reagent grade or higher, obtained from commercial sources and used without further purification. Solvents for reactions were of *p.a.* grade or distilled prior to their use. Deuterated NMR-solvents were purchased from *Armar Chemicals* (CH) or *Cambridge Isotope Laboratories, Inc.* (UK).  $(\text{NH}_4)[^{99}\text{TcO}_4]$  was purchased from *Oak Ridge* and treated with  $\text{H}_2\text{O}_2$  prior to reactions for re-oxidation.  $[^{99\text{m}}\text{Tc}(\text{H}_2\text{O})_3(\text{CO})_3]^+$  ( $[6]^+$ ) was synthesized with the *isolink kit* chemicals sodium boranocarbonate, sodium tartrate dihydrate and sodium tetraborate decahydrate.<sup>[1,2]</sup>  $(\text{NEt}_4)_2[\text{Re}(\text{CO})_3\text{Br}_3]$ ,  $(\text{NEt}_4)_2[\text{Tc}(\text{CO})_3\text{Cl}_3]$  and 2,6-bis((di-tertbutylphosphino)methyl)pyridine ( $\text{PyrPNP}^{\text{tBu}}$ ) were synthesized following literature procedures.<sup>[3-5]</sup>  $\text{Na}[^{99\text{m}}\text{TcO}_4]$  in 0.9% saline was eluted from a  $^{99}\text{Mo}/^{99\text{m}}\text{Tc}$  *Ultratechnekow FM* generator purchased from *b. e. imaging AG* (Switzerland). Caution:  $^{99}\text{Tc}$  is a weak  $\beta$ -emitter,  $^{99\text{m}}\text{Tc}$  is a weak  $\gamma$ -emitter. All experiments must be carried out in licensed and appropriately shielded laboratories for low-level radioactive materials. **NMR:** NMR spectra were recorded in deuterated solvents at 298 K on *Bruker AV-400* (400 MHz) or *Bruker AV2-500* (500 MHz) spectrometers.  $^1\text{H}$  and  $^{13}\text{C}$  chemical shifts ( $\delta$ ) are given in ppm relative to residual solvent resonances ( $\text{CD}_2\text{Cl}_2$   $^1\text{H}$ :  $\delta$  5.32;  $^{13}\text{C}$ :  $\delta$  53.84;  $\text{THF-}d_8$ :  $^1\text{H}$ :  $\delta$  1.72;  $^{13}\text{C}$ :  $\delta$  25.31). Signal assignments are based on coupling constants and/or supportive NMR experiments. The NMR measurements were highly influenced by the characteristics of technetium. Its paramagnetic nature and the large nuclear quadrupolar moment both strongly accelerate  $t_1$  and  $t_2$  relaxation up to complete signal extinction. **IR:** FT-IR spectra were recorded with *SpectrumTwo FT-IR Spectrometer* (*Perkin-Elmer*) and samples were applied as KBr pellets. **LSC: Technetium content measurements:** Products were dissolved in the appropriate solvents. The measurements were carried out with a scintillation cocktail (*Packard Ultimate Gold XR*) and a *Hidex 300 SL* liquid scintillation counter. Yields of compounds were calculated from activity yields by LSC measurement. **Microwave reactions:** Microwave assisted reactions ( $^{99\text{m}}\text{Tc}$ ) were carried out in a *Biotage Initiator*. **X-ray diffraction:** Single-crystal X-ray diffraction data was collected at 160(1) K on a *Rigaku OD XtaLAB Synergy, Dualflex, Pilatus 200K* diffractometer using a single wavelength X-ray source ( $\text{Cu K}_\alpha$  radiation:  $\lambda = 1.54184 \text{ \AA}$  for (**3**)( $\text{PF}_6$ ), (**3**)( $\text{BF}_4$ ), (**5**)( $\text{PF}_6$ ), **9**) or on a *Rigaku XtaLAB Synergy, Dualflex, HyPix* diffractometer using a single wavelength X-ray source ( $\text{Cu K}_\alpha$  radiation:  $\lambda = 1.54184 \text{ \AA}$  for (**2**) or  $\text{Mo K}_\alpha$  radiation:  $\lambda = 0.71073 \text{ \AA}$  for **11**) from a micro-focus sealed X-ray tube and an *Oxford* liquid-nitrogen *Cryostream* cooler. The selected suitable single crystal was mounted using polybutene oil on a flexible loop fixed on a goniometer head and immediately transferred to the diffractometer. Pre-experiments, data collection, data reduction and analytical absorption correction<sup>[6]</sup> were performed with the program suite *CrysAlis<sup>Pro</sup>*.<sup>[7]</sup> Using *Olex2*,<sup>[8]</sup> the structures were solved with the *SHELXT*<sup>[9]</sup> small molecule structure solution program and refined with the *SHELXL 2018/3*<sup>[10]</sup> program package by full-matrix least-squares minimization on  $F^2$ . *PLATON*<sup>[11]</sup> was used to check the result of the X-ray analysis. Ill-defined electron density in [**9**] had to be treated with the *SQUEEZE* procedure in *PLATON*.<sup>[11]</sup> For more details about the data collection and refinement parameter, see the CIF files. **UHPLC-ESI-MS:** Samples (2  $\mu\text{l}$  injection) were analyzed with a *Vanquish<sup>TM</sup> Horizon UHPLC System* (*Thermo Fisher Scientific*, Waltham, USA) connected to a *Vanquish<sup>TM</sup> e $\lambda$*  detector and *ISQ-EM ESI mass spectrometer* (*Thermo Fisher Scientific*, Waltham, USA), operated in positive mode; scan range  $m/z$  200–1500. Separation was performed with an *Acquity BEH C18 HPLC column* (1.7  $\mu\text{m}$  particle size, 2x100 mm, Waters) kept at 40 °C. The mobile phase consisted of A:  $\text{H}_2\text{O} + 0.1\% \text{ HCOOH}$  and B:  $\text{CH}_3\text{CN} + 0.1\% \text{ HCOOH}$ . UV spectra were recorded between 190 and 670 nm at a 4 nm resolution and at 5 Hz. The mass spectrometer was operated in the positive (negative) electrospray ionization mode at 3000 V (-2'000 V) capillary voltage with a  $\text{N}_2$  Sheath gas pressure of 41.9 psi, auxiliary gas pressure of 5.5 psi and sweep gas pressure of 0.1 psi. Spectra were acquired in the mass range from  $m/z$  150 to 2'000. Method: 0-0.5 min 5% B; 0.5-4.5 min linear gradient from 5 to 100% B; 4.5-5 min 100% B, 5-5.1 min linear gradient from 100 to 5% B, 5.1-5.5 min isocratic gradient with 5% B; flow rate was 0.6 mL/min. **Radio-HPLC:** *VWR Hitachi Chromaster* with tuneable UV detector (250nm), radio detector (*Berthold LB514, YG 150-S5D*), *Nucleosil C-18 column* (100 $\text{\AA}$ , 5 $\mu\text{m}$ , 250x4mm), flow rate of 0.5mL/min, 0.1% TFA in  $\text{H}_2\text{O}$  (solvent A) and methanol (solvent B) with the following gradient: 0-3min: 90% A (10% B); 3-3.1min: 90% A

(10% B) to 75% A (25% B); 3.1–9min: 75% A (25% B); 9-9.1min: 75% A (25% B) to 66% A (34% B); 9.1-20min: 66% A (34% B) to 0% A (100% B); 20-25min: 0% A (100% B); 25-30min: 0% A (100% B) to 90% A (10% B).

## 2. Remarks on NMR spectroscopy with <sup>99</sup>Tc complexes

We have already reported on analogous observations with <sup>99</sup>Tc NMR spectroscopy that are true for this work as well, as described below.<sup>[12]</sup> The influence of quadrupolar nuclei like <sup>99</sup>Tc (spin I = 9/2, quadrupole relaxation time  $T_{1Q}$ ) onto the relaxation time of scalarly coupled nuclei like <sup>13</sup>C ( $T_{1-SC}$ ) is described by formula (I) according to literature.<sup>[13]</sup>

$$\frac{1}{T_{1-SC}} = \frac{8\pi^2 J^2}{3} I(I+1) \frac{T_{1Q}}{1 + (\omega_C - \omega_I)^2 T_{1Q}^2} \quad (I)$$

In this regard, a significant increase of <sup>13</sup>C  $T_1$  relaxation due to strong scalar coupling with <sup>99</sup>Tc might be an explanation for the unobservability of carbon sites which are directly bound to the technetium center (CO):

Considering <sup>13</sup>C-<sup>99</sup>Tc coupling constants  $J$  of some 100 Hz and a typical <sup>99</sup>Tc relaxation time  $T_{1Q}$  in the *millisecond* range, in conjunction with the close resonance frequencies of carbon and technetium (125 vs. 113 MHz), relation (I) predicts significant scalar <sup>13</sup>C relaxation  $1/T_{1-SC}$  in the kHz range, causing broadening and weakening effects onto the <sup>13</sup>C signal, up to its loss.

Rhenium bound <sup>13</sup>C nuclei are, in contrast, *not* influenced by scalar  $T_1$  relaxation as both rhenium isotopes (<sup>185,187</sup>Re) undergo extraordinarily fast quadrupolar relaxation  $T_{1Q}$  in the *microsecond* range. Therefore, equation (I) yields values close to zero, cancelling any scalar relaxation effects  $1/T_{1-SC}$  in the case of rhenium.

### 3 Experimental Procedures and Data

#### 3.1 *mer*-[Re(<sup>Pyr</sup>PNP<sup>t</sup>Bu)(CO)<sub>3</sub>]<sup>+</sup>, [3](PF<sub>6</sub>)

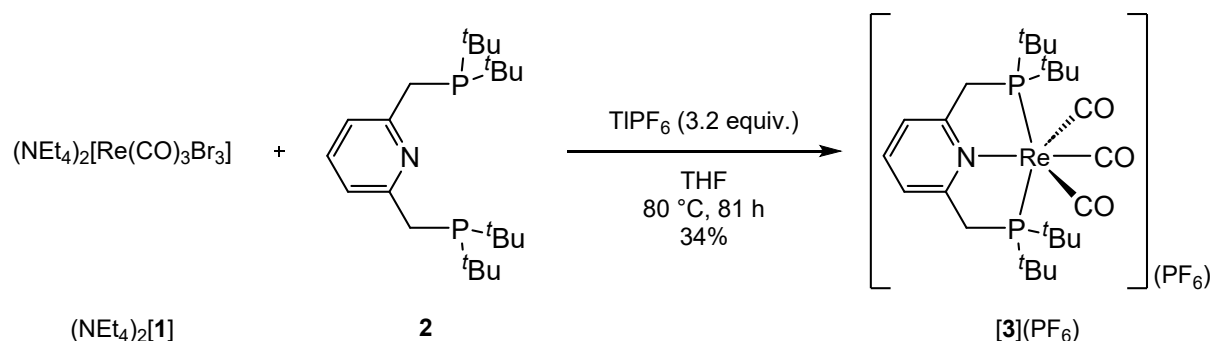

**Synthesis:** A round-bottom flask was charged with (NEt<sub>4</sub>)<sub>2</sub>[1] (100.0 mg, 129.0 μmol), <sup>Pyr</sup>PNP<sup>t</sup>Bu (**2**) (56.3 mg, 142.0 μmol), TlPF<sub>6</sub> (145.0 mg, 414.0 μmol) and a magnetic stir bar under inert atmosphere. THF (dry, 25 mL) was added to the mixture and an immediate formation of a colorless precipitate was observed. While stirring, the reaction mixture was heated to reflux and allowed to cool down after 81 h of heating. The off-white precipitate was filtered off with a P4 glass filter frit and the filtrate was transferred into a flask. Layering of the filtrate with hexanes afforded colorless, crystalline material (suitable for XRD) that was separated after 4 h and washed with hexanes. Product [3](PF<sub>6</sub>) was obtained as a colorless crystalline solid in 34% yield (35.3 mg, 43.4 μmol).

**Analysis:** IR (KBr)  $\nu$  [cm<sup>-1</sup>]: 3434<sub>w</sub>, 2999<sub>m</sub>, 2959<sub>m</sub>, 2880<sub>m</sub>, 2047<sub>s</sub> (CO), 1946<sub>s</sub> (CO), 1913<sub>s</sub> (CO), 1601<sub>w</sub>, 1482<sub>m</sub>, 1463<sub>m</sub>, 1395<sub>m</sub>, 1377<sub>m</sub>, 1290<sub>m</sub>, 1183<sub>m</sub>, 1024<sub>w</sub>, 838<sub>s</sub>, 628<sub>m</sub>, 558<sub>m</sub>. <sup>1</sup>H NMR (500 MHz, CD<sub>2</sub>Cl<sub>2</sub>)  $\delta$  [ppm]: 7.91 (*t*, <sup>3</sup>J<sub>HH</sub> = 7.83 Hz, 1 H, CH<sub>pyr(4)</sub>); 7.65 (*d*, <sup>3</sup>J<sub>HH</sub> = 7.83 Hz, 2 H, CH<sub>pyr(3,5)</sub>); 3.92 (*dd*-like *t*, <sup>2</sup>J<sub>HH</sub> = 3.08 Hz, 4 H, PCH<sub>2</sub>); 1.38 (*t*-like *m*, 36 H, PC(CH<sub>3</sub>)<sub>3</sub>). <sup>13</sup>C{<sup>1</sup>H} NMR (125 MHz, CD<sub>2</sub>Cl<sub>2</sub>)  $\delta$  [ppm]: 197.3 (*t*, <sup>2</sup>J<sub>CP</sub> = 7.8 Hz, 2 C, 2 *trans*-CO); 196.5 (*t*, <sup>2</sup>J<sub>CP</sub> = 3.6 Hz, 1 C, CO); 164.4 (*t*, <sup>2</sup>J<sub>CP</sub> = 2.6 Hz, 2 C, C<sub>pyr(2,6)</sub>); 141.2 (*s*, 1 C, CH<sub>pyr(4)</sub>); 123.3 (*t*, <sup>3</sup>J<sub>CP</sub> = 4.0 Hz, 2 C, CH<sub>pyr(3,5)</sub>); 40.9 (*t*, <sup>2</sup>J<sub>CP</sub> = 10.0 Hz, 2 C, PCH<sub>2</sub>); 38.9 (*t*, <sup>1</sup>J<sub>CP</sub> = 9.8 Hz, 4 C, PC(CH<sub>3</sub>)<sub>3</sub>); 30.3 (*t*, <sup>2</sup>J<sub>CP</sub> = 1.6 Hz, 12 C, PC(CH<sub>3</sub>)<sub>3</sub>). <sup>31</sup>P{<sup>1</sup>H} NMR (202 MHz, CD<sub>2</sub>Cl<sub>2</sub>)  $\delta$  [ppm]: 67.53 (*s*, 2 P, PC(CH<sub>3</sub>)<sub>3</sub>); -144.44 (*sep*, <sup>1</sup>J<sub>PF</sub> = 710.8 Hz, 1 P, PF<sub>6</sub>). <sup>19</sup>F NMR (470 MHz, CD<sub>2</sub>Cl<sub>2</sub>)  $\delta$  [ppm]: -72.95 (*d*, <sup>1</sup>J<sub>FP</sub> = 710.8 Hz, 6 F, PF<sub>6</sub>). UHPLC-ESI-MS: R<sub>t</sub> = 3.44 min, [M]<sup>+</sup> = calc. for C<sub>26</sub>H<sub>43</sub>NO<sub>3</sub>P<sub>2</sub>Re: 666.2 m/z, found: 666.1 m/z and [M-CO]<sup>+</sup> = calc. for C<sub>25</sub>H<sub>43</sub>NO<sub>2</sub>P<sub>2</sub>Re: 638.2 m/z, found: 638.2 m/z.

#### 3.2 *mer*-[Re(<sup>Pyr</sup>PNP<sup>t</sup>Bu)(CO)<sub>3</sub>]<sup>+</sup>, [3](BF<sub>4</sub>)

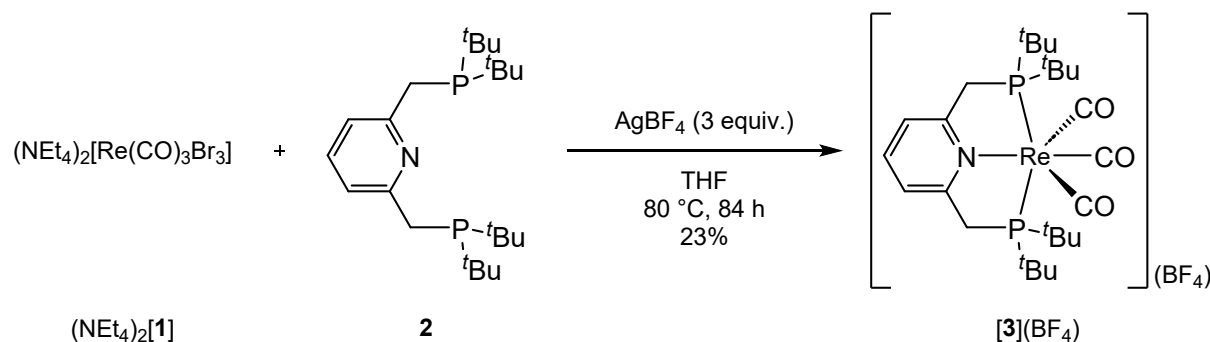

**Synthesis:** The synthesis of [3](BF<sub>4</sub>) followed an analogous procedure as in the synthesis of [3](PF<sub>6</sub>) (3.1). (NEt<sub>4</sub>)<sub>2</sub>[1] (25.0 mg, 32.3 μmol), <sup>Pyr</sup>PNP<sup>t</sup>Bu (**2**) (14.0 mg, 36.0 μmol) and AgBF<sub>4</sub> (18.0 mg, 92.8 μmol) were mixed in a round-bottom flask and dry THF (25 mL) was added under inert atmosphere.

The stirred mixture was heated to reflux for 84 h and subsequently the grey suspension was filtered (P4). The solvent of the slightly pale yellowish filtrate was removed *in vacuo* and pale yellowish crystalline material was obtained and characterized to be [3](BF<sub>4</sub>) in a yield of 23% (6.9 mg, 9.16 μmol).

**Analysis:** c.f. 3.2 for [3](PF<sub>6</sub>), IR bands of BF<sub>4</sub><sup>-</sup> (KBr) ν [cm<sup>-1</sup>]: 1463*m*, 1374*m*, 1061*s*.

### 3.3 *mer*-[Tc(PyrPNP<sup>*t*</sup>Bu)(CO)<sub>3</sub>]<sup>+</sup>, [5](PF<sub>6</sub>)

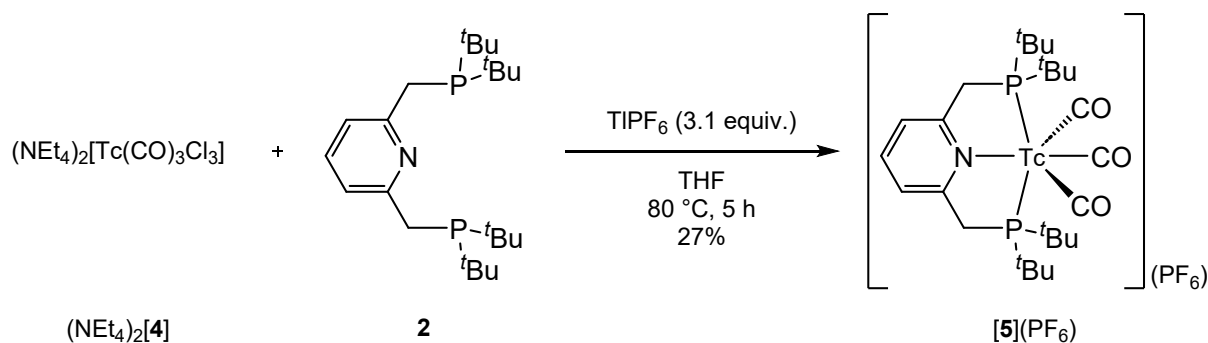

**Synthesis:** A round-bottom flask was charged with (NEt<sub>4</sub>)<sub>2</sub>[4] (23.3 mg, 42.5 μmol), <sup>Pyr</sup>PNP<sup>*t*</sup>Bu (**2**) (25.0 mg, 63.2 μmol, 1.5 equiv.), TIPF<sub>6</sub> (45.0 mg, 128.6 μmol, 3 equiv.) and a magnetic stir bar under inert atmosphere. THF (dry, 15 mL) was added to the mixture and an immediate formation of a colorless precipitate was observed. While stirring, the reaction mixture was heated to reflux for 5 h and subsequently allowed to cool down. The off-white precipitate was filtered off with a P4 glass filter frit and the filtrate was transferred into a vial. Layering of the filtrate with hexanes afforded slightly yellowish colored crystals of [5](PF<sub>6</sub>) in 27% yield (8.27 mg, 11.5 μmol).

**Analysis:** IR (KBr) ν [cm<sup>-1</sup>]: 3434*w*, 2973*m*, 2878*w*, 2053*w* (CO), 1960*s* (CO), 1923*s* (CO), 1624*w*, 1480*m*, 1462*m*, 1396*w*, 1289*w*, 1182*w*, 1023*m*, 895*m*, 839*s*, 630*w*, 558*m*. <sup>1</sup>H NMR (400 MHz, CD<sub>2</sub>Cl<sub>2</sub>) δ [ppm]: 7.86 (*t*, <sup>3</sup>J<sub>HH</sub> = 7.96 Hz, 1 H, CH<sub>pyr(4)</sub>); 7.57 (*d*, <sup>3</sup>J<sub>HH</sub> = 7.84 Hz, 2 H, CH<sub>pyr(3,5)</sub>); 3.71 (*t*-like *m*, <sup>2</sup>J<sub>HH</sub> = 2.50 Hz, 4 H, PCH<sub>2</sub>); 1.37 (*t*-like *m*, 36 H, (PC(CH<sub>3</sub>)<sub>3</sub>)). <sup>13</sup>C{<sup>1</sup>H} NMR (126 MHz, CD<sub>2</sub>Cl<sub>2</sub>) δ [ppm]: 163.0 (*t*, <sup>2</sup>J<sub>CP</sub> = 2.7 Hz, 2 C, C<sub>pyr(2,6)</sub>); 140.9 (*s*, 1 C, CH<sub>pyr(4)</sub>); 123.5 (*t*, <sup>3</sup>J<sub>CP</sub> = 4.0 Hz, 2 C, CH<sub>pyr(3,5)</sub>); 39.0 (*t*, <sup>2</sup>J<sub>CP</sub> = 7.9 Hz, 2 C, PCH<sub>2</sub>); 38.4 (*t*, <sup>1</sup>J<sub>CP</sub> = 7.7 Hz, 4 C, PC(CH<sub>3</sub>)<sub>3</sub>); 30.4 (*t*-like *s*, 12 C, PC(CH<sub>3</sub>)<sub>3</sub>); <sup>13</sup>C signals of CO ligands not observed (c.f. section 3.8). <sup>31</sup>P{<sup>1</sup>H} NMR (202 MHz, CD<sub>2</sub>Cl<sub>2</sub>) δ [ppm]: 90.78 (*br s*, Δ<sub>1/2</sub> = 4.4 kHz, 2 P, PC(CH<sub>3</sub>)<sub>3</sub>); -142.71 (*sep*, <sup>1</sup>J<sub>PF</sub> = 711.68 Hz, 1 P, PF<sub>6</sub>). <sup>19</sup>F NMR (471 MHz, CD<sub>2</sub>Cl<sub>2</sub>) δ [ppm]: -73.08 (*d*, <sup>1</sup>J<sub>FP</sub> = 710.6 Hz, 6 F, PF<sub>6</sub>). <sup>99</sup>Tc NMR (90.1 MHz, C<sub>6</sub>D<sub>6</sub>) δ [ppm]: -1574 (Δ<sub>1/2</sub> = 2.2 kHz). <sup>99</sup>Tc analysis calc. for C<sub>26</sub>H<sub>43</sub>F<sub>6</sub>NO<sub>3</sub>P<sub>3</sub>Tc (·Et<sub>4</sub>NPF<sub>6</sub>) (%): 9.90; found: 8.89.

### 3.4 *mer*-[<sup>99m</sup>Tc(<sup>Pyr</sup>PNP<sup>t</sup>Bu)(CO)<sub>3</sub>], [7]<sup>+</sup>

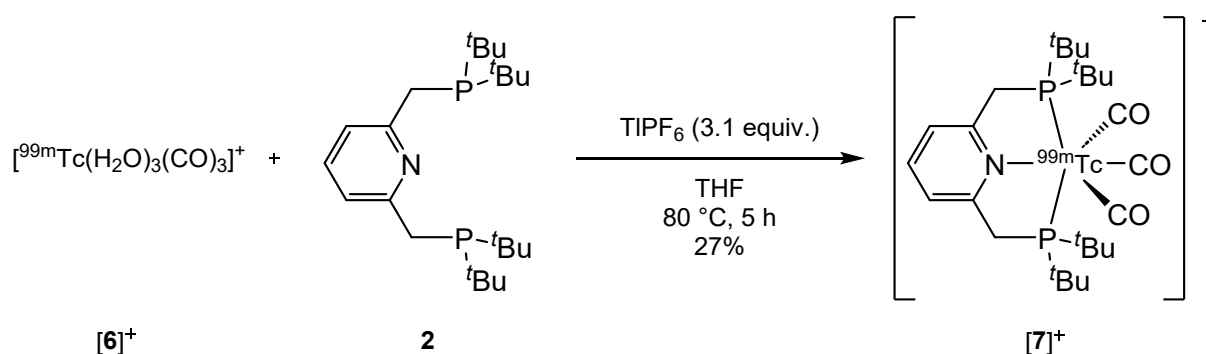

**Synthesis:** Method a: A microwave vial was charged with 1.0 mL of an aqueous solution containing freshly prepared [<sup>99m</sup>Tc(H<sub>2</sub>O)<sub>3</sub>(CO)<sub>3</sub>]<sup>+</sup> ([6]<sup>+</sup>). The vial was sealed and flushed with N<sub>2</sub> for 15 min and in a separate vial <sup>Pyr</sup>PNP<sup>t</sup>Bu (**2**) (10.1 mg, 25.5 μmol) was dissolved in 1 mL of degassed EtOH. The EtOH solution of **2** was added to the sealed vial with a syringe and subsequently the vial was placed in the microwave for 30 min at 100 °C. Complex [7]<sup>+</sup> was obtained with 92% RCP and purification with radio-HPLC delivered [7]<sup>+</sup> in 97% RCP. (RCY: 95%).

Method b: Alternatively, [7]<sup>+</sup> may also be synthesized in a 1-pot reaction with eluted [<sup>99m</sup>TcO<sub>4</sub>]<sup>-</sup> in presence of the *isolink kit* chemicals and <sup>Pyr</sup>PNP<sup>t</sup>Bu (**2**) in a H<sub>2</sub>O/EtOH (1:1, degassed) solution, yielding equivalent results after 30 min at 100 °C in the microwave.

**Analysis: Radio-HPLC:** R<sub>t</sub> = 25.53 min, RCP: 97.1%.

### 3.5 *fac*-[Re(κ<sup>2</sup>-terpy)(CO)<sub>3</sub>(PO<sub>2</sub>F<sub>2</sub>)], [9]

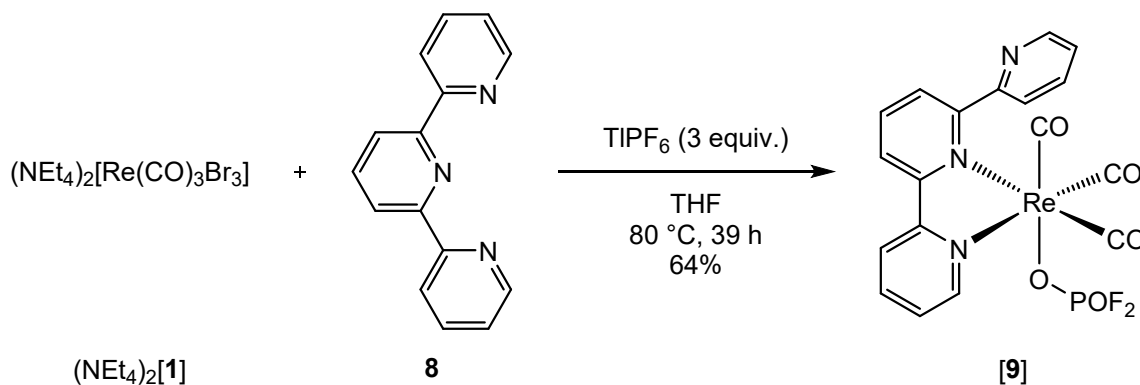

**Synthesis:** A round-bottom flask was charged with (NEt<sub>4</sub>)<sub>2</sub>[**1**] (50.4 mg, 65.4 μmol), terpy (**8**) (16.3 mg, 69.9 μmol, 1.1 equiv.), TlPF<sub>6</sub> (67.8 mg, 194.1 μmol, 3 equiv.) and a magnetic stir bar under inert atmosphere. THF (dry, 10 mL) was added to the mixture and an immediate formation of a colorless precipitate was observed. While stirring, the reaction mixture was heated to reflux for 39 h and subsequently allowed to cool down. The off-white precipitate was filtered off with a P4 glass filter frit and the filtrate was concentrated. Layering of the filtrate with hexanes afforded [9] as pale yellowish, crystalline material after washing with hexanes in a yield of 64% (25.4 mg, 42.0 μmol).

**Analysis: IR** (KBr) ν [cm<sup>-1</sup>]: 3434<sub>w</sub>, 2924<sub>m</sub>, 2853<sub>m</sub>, 2021<sub>s</sub> (CO), 1916<sub>s</sub> (CO), 1895<sub>s</sub> (CO), 1768<sub>w</sub>, 1719<sub>w</sub>, 1605<sub>w</sub>, 1453<sub>m</sub>, 1313<sub>m</sub> (PO<sub>2</sub>F<sub>2</sub><sup>-</sup>), 1158<sub>m</sub> (PO<sub>2</sub>F<sub>2</sub><sup>-</sup>), 1034<sub>w</sub>, 842<sub>s</sub> (PO<sub>2</sub>F<sub>2</sub><sup>-</sup>), 775<sub>m</sub>, 647<sub>w</sub>, 558<sub>w</sub>, 498<sub>w</sub> (PO<sub>2</sub>F<sub>2</sub><sup>-</sup>). **<sup>1</sup>H NMR** (400 MHz, THF-*d*<sub>8</sub>) δ [ppm]: 9.14 (*d*, <sup>3</sup>J<sub>HH</sub> = 5.2 Hz, 1 H, CH<sub>terpy-1</sub>); 8.77 (*d*, <sup>3</sup>J<sub>HH</sub> = 4.5 Hz, 1 H, CH<sub>terpy-11</sub>); 8.62 (*t* (2 overlaid *d*), 2 H, CH<sub>terpy-5,4</sub>); 8.33 (*t*, <sup>3</sup>J<sub>HH</sub> = 7.94 Hz, 1 H, CH<sub>terpy-</sub>

6); 8.27 (*t*,  $^3J_{\text{HH}} = 7.0$  Hz, 1 H,  $\text{CH}_{\text{terpy-3}}$ ); 7.95 (*t*,  $^3J_{\text{HH}} = 7.4$  Hz, 1 H,  $\text{CH}_{\text{terpy-9}}$ ); 7.88 (*t* (2 overlaid *d*), 2 H,  $\text{CH}_{\text{terpy-8,7}}$ ); 7.71 (*t*,  $^3J_{\text{HH}} = 6.4$  Hz, 1 H,  $\text{CH}_{\text{terpy-2}}$ ); 7.52 (*t*,  $^3J_{\text{HH}} = 6.2$  Hz, 1 H,  $\text{CH}_{\text{terpy-10}}$ ).  $^{31}\text{P}\{^1\text{H}\}$  NMR (162 MHz, THF-*d*<sub>8</sub>)  $\delta$  [ppm]: -16.19 (*t*,  $^1J_{\text{FP}} = 961.7$  Hz, 1 P,  $\text{PO}_2\text{F}_2$ ).  $^{19}\text{F}\{^1\text{H}\}$  NMR (376 MHz, THF-*d*<sub>8</sub>)  $\delta$  [ppm]: -73.66 (*d*,  $^1J_{\text{FP}} = 710.30$  Hz, 1 F, minimal traces of  $\text{PF}_6$  (not visible in  $^{31}\text{P}\{^1\text{H}\}$ )), -84.5 (*d*,  $^1J_{\text{FP}} = 961.3$  Hz, 2 F,  $\text{PO}_2\text{F}_2$ ). UHPLC-ESI-MS:  $R_t = 2.26$  min,  $[\text{M}-(\text{PO}_2\text{F}_2^-)]^+ = \text{calc. for } \text{C}_{18}\text{H}_{11}\text{N}_3\text{O}_3\text{Re}$ : 504.0 m/z, found: 504.0 m/z and  $[\text{M}-(\text{PO}_2\text{F}_2^-)+\text{MeCN}]^+ = \text{calc. for } \text{C}_{25}\text{H}_{14}\text{N}_3\text{O}_3\text{Re}$ : 545.1 m/z, found: 545.0 m/z.

### 3.6 *fac*-[Re( $\kappa^2$ -terpy)(CO)<sub>3</sub>Br], [10]

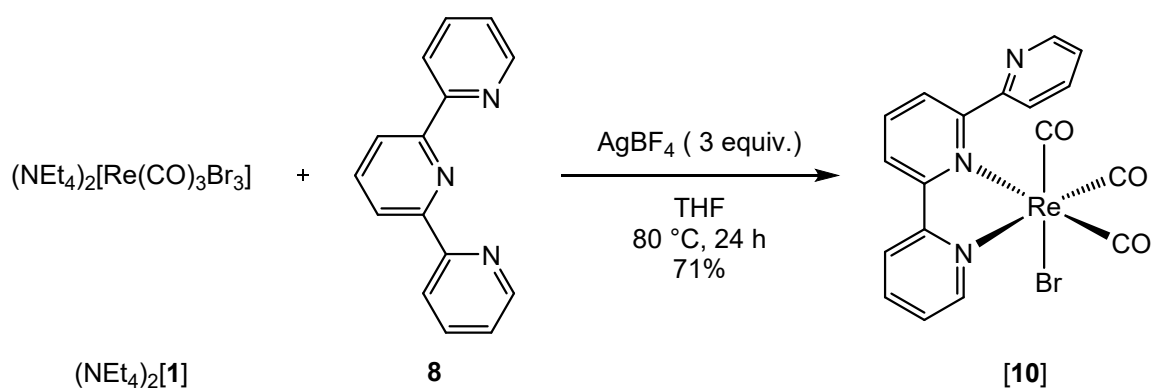

**Synthesis:** A round-bottom flask was charged with  $(\text{NEt}_4)_2[\mathbf{1}]$  (47.7 mg, 61.9  $\mu\text{mol}$ ), terpy (**8**) (15.8 mg, 67.8  $\mu\text{mol}$ , 1.1 equiv.),  $\text{AgBF}_4$  (36.0 mg, 184.9  $\mu\text{mol}$ , 3 equiv.) and a magnetic stir bar under inert atmosphere. THF (dry, 12 mL) was added to the mixture and an immediate formation of a yellowish suspension was observed. While stirring, the reaction mixture was heated to reflux for 24 h and subsequently allowed to cool down. The greyish precipitate was filtered off with a P4 glass filter frit and the solvent of the greenish-yellowish filtrate was evaporated *in vacuo*. The residue was washed with  $\text{H}_2\text{O}$  (3x5 mL) and subsequently redissolved in minimal THF. Layering of the solution with hexanes afforded **[10]** as yellow, crystalline material after washing with hexanes in a yield of 71% (25.7 mg, 44.1  $\mu\text{mol}$ ).

**Analysis:** Complex **[10]** has already been obtained via a different route published by Abel, *et al.*<sup>[14]</sup> and the obtained data is in agreement.

### 3.7 *fac*-[Tc( $\kappa^2$ -terpy)(CO)<sub>3</sub>Cl], [11]

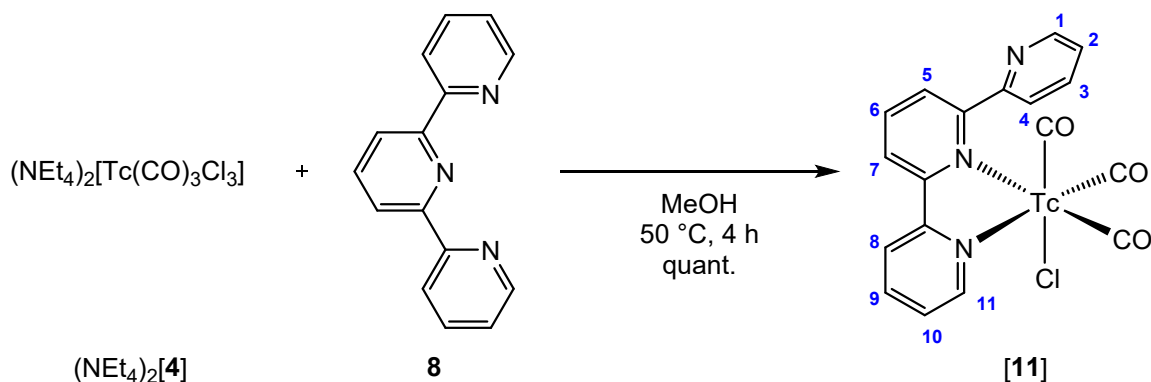

**Synthesis:**  $(\text{NEt}_4)_2[\mathbf{4}]$  (39.9 mg, 72.6  $\mu\text{mol}$ ) was dissolved in 5 mL of MeOH and stirred in a round-bottom flask. Terpy (**8**) (17.3 mg, 74.0  $\mu\text{mol}$ , 1 equiv.) was dissolved in 2 mL of MeOH and added to



stirred solution. The yellow solution was heated to 50 °C for 4 h while the color changed to pale green. After cooling, the solvent was evaporated under a stream N<sub>2</sub> and the remaining solid was washed by stirring in water. The solution was decanted and the residue was dried. The product was extracted with CH<sub>2</sub>Cl<sub>2</sub> and subsequently overlaid with hexanes. Crystallization yielded olive-green crystals of [11] in quantitative yield.

**Analysis:** IR (KBr)  $\nu$  [cm<sup>-1</sup>]: 3446<sub>w</sub>, 2989<sub>w</sub>, 2026<sub>s</sub> (CO), 1914<sub>s</sub> (CO), 1887<sub>s</sub> (CO), 1460<sub>m</sub>, 1402<sub>w</sub>, 1308<sub>w</sub>, 1184<sub>w</sub>, 1033<sub>w</sub>, 1005<sub>w</sub>, 798<sub>w</sub>, 667<sub>w</sub>, 636<sub>w</sub>, 502<sub>w</sub>. <sup>1</sup>H NMR (400 MHz, CD<sub>2</sub>Cl<sub>2</sub>, T = 298 K)  $\delta$  [ppm]: 8.99 (br *s*, 1 H, CH<sub>terpy-1</sub>); 8.81 (br *s*, 1 H, CH<sub>terpy-11</sub>); 8.27 (br *s*, 2 H, CH<sub>terpy-4,5</sub>); 8.16 (*t*, <sup>3</sup>J<sub>HH</sub> = 7.76 Hz, 1 H, CH<sub>terpy-6</sub>); 8.08 (br *s*, 1 H, CH<sub>terpy-3</sub>); 7.93 (br *s*, 2 H, CH<sub>terpy-8,9</sub>); 7.78 (br *s*, 1 H, CH<sub>terpy-7</sub>); 7.53 (br *s*, 2 H, CH<sub>terpy-2,10</sub>). <sup>1</sup>H NMR (400 MHz, CD<sub>2</sub>Cl<sub>2</sub>, T = 235 K)  $\delta$  [ppm]: 8.96 (*d*, <sup>3</sup>J<sub>HH</sub> = 4.65 Hz, 1 H, CH<sub>terpy-1</sub>); 8.79 (*d*, <sup>3</sup>J<sub>HH</sub> = 4.40 Hz, 1 H, CH<sub>terpy-11</sub>); 8.30 (*d*, <sup>3</sup>J<sub>HH</sub> = 7.90 Hz, 1 H, CH<sub>terpy-5</sub>); 8.27 (*d*, <sup>3</sup>J<sub>HH</sub> = 8.25 Hz, 1 H, CH<sub>terpy-4</sub>); 8.16 (*t*, <sup>3</sup>J<sub>HH</sub> = 7.75 Hz, 1 H, CH<sub>terpy-6</sub>); 8.08 (*t*, <sup>3</sup>J<sub>HH</sub> = 7.63 Hz, 1 H, CH<sub>terpy-3</sub>); 7.94 (*t*, <sup>3</sup>J<sub>HH</sub> = 6.98 Hz, 1 H, CH<sub>terpy-9</sub>); 7.82 (*d*, <sup>3</sup>J<sub>HH</sub> = 7.45 Hz, 1 H, CH<sub>terpy-8</sub>); 7.75 (*d*, <sup>3</sup>J<sub>HH</sub> = 7.45 Hz, 1 H, CH<sub>terpy-7</sub>); 7.53 (*p* (2 overlaid *t*), 2 H, CH<sub>terpy-2,10</sub>). <sup>13</sup>C{<sup>1</sup>H} NMR (125 MHz, CD<sub>2</sub>Cl<sub>2</sub>)  $\delta$  [ppm]: 152.8 (*s*, 1 C, CH<sub>terpy</sub>); 149.7 (*s*, 1 C, CH<sub>terpy</sub>); 139.3 (*s*, 1 C, CH<sub>terpy</sub>); 138.9 (*s*, 1 C, CH<sub>terpy</sub>); 136.9 (*s*, 1 C, CH<sub>terpy</sub>); 127.3 (*s*, 1 C, CH<sub>terpy</sub>); 126.0 (*s*, 1 C, CH<sub>terpy</sub>); 125.4 (*s*, 1 C, CH<sub>terpy</sub>); 124.8 (*s*, 1 C, CH<sub>terpy</sub>); 123.6 (*s*, 1 C, CH<sub>terpy</sub>); 122.2 (*s*, 1 C, CH<sub>terpy</sub>). <sup>99</sup>Tc NMR (90.1 MHz, CD<sub>2</sub>Cl<sub>2</sub>)  $\delta$  [ppm]: -1002 ( $\Delta_{1/2}$  = 380 Hz). <sup>99</sup>Tc analysis calc. for C<sub>18</sub>H<sub>11</sub>ClN<sub>3</sub>O<sub>3</sub>Tc (%): 21.90; found: 20.61.

### 3.8 Fluxional behaviour of *fac*-[Tc( $\kappa^2$ -terpy)(CO)<sub>3</sub>Cl], [11]

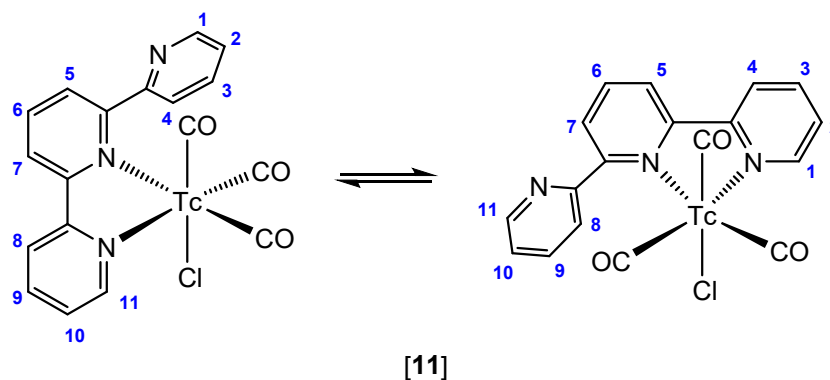

**Scheme S1:** Fluxional behaviour of the ( $\kappa^2$ -terpy) ligand in complex [11]. The scheme shows both interconverting structures with NMR numbering (3.7).

## 4 Spectra

### 4.1 *mer*-[Re(<sup>Py</sup>rPNP<sup>t</sup>Bu)(CO)<sub>3</sub>]<sup>+</sup>, [3](PF<sub>6</sub>)

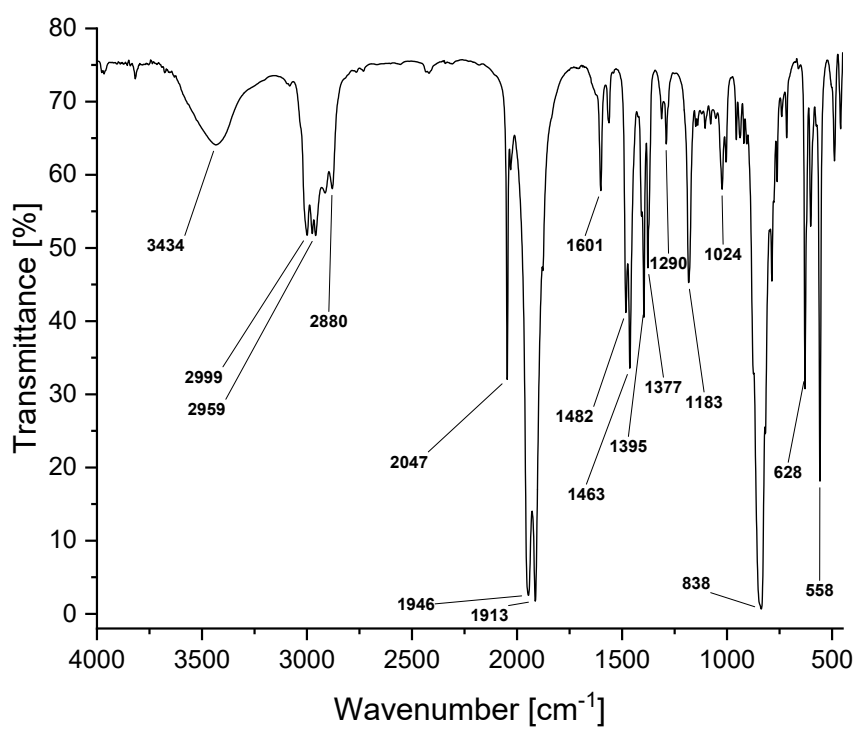

Figure S 1: IR spectrum (KBr) of *mer*-[Re(<sup>Py</sup>rPNP<sup>t</sup>Bu)(CO)<sub>3</sub>]<sup>+</sup>, [3](PF<sub>6</sub>).

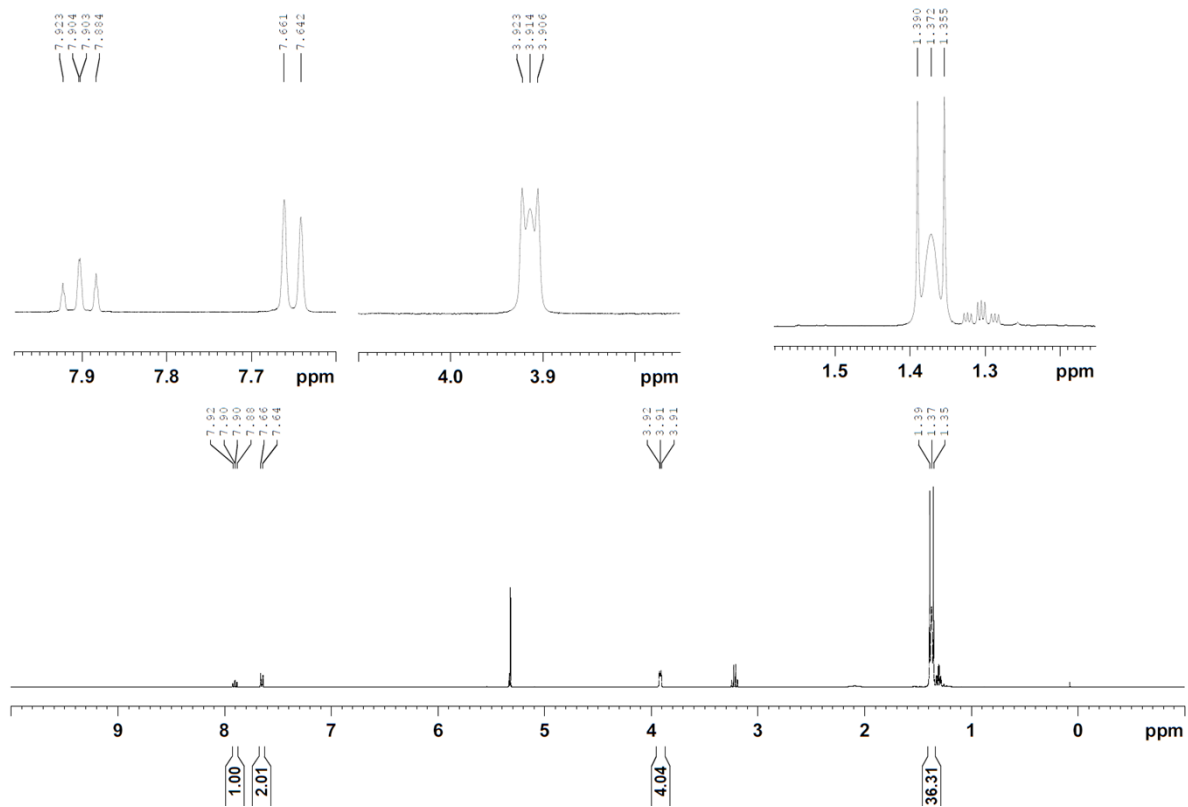

**Figure S 2:**  $^1\text{H}$  NMR spectrum of  $\text{mer-}[\text{Re}(\text{PyrrPNP}^t\text{Bu})(\text{CO})_3]^+$ ,  $[\mathbf{3}](\text{PF}_6)$  in  $\text{CD}_2\text{Cl}_2$ .

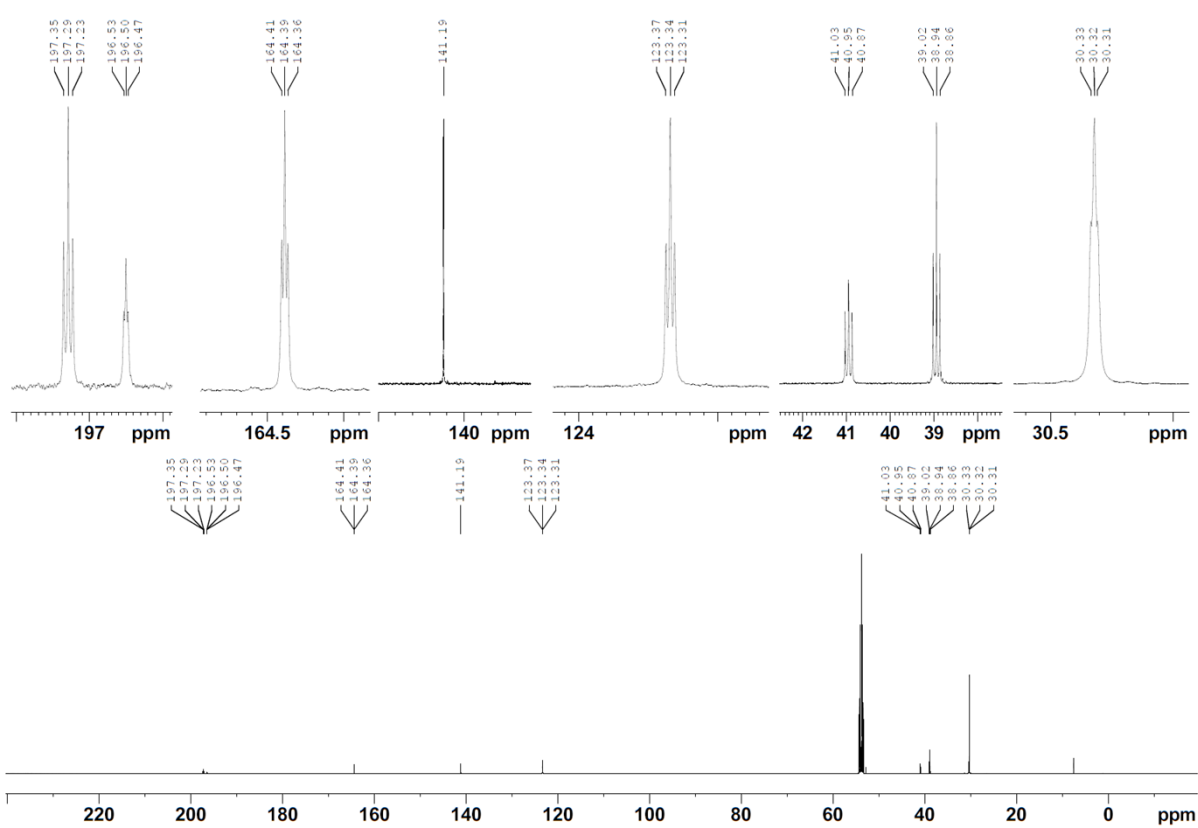

**Figure S 3:**  $^{13}\text{C}\{^1\text{H}\}$  NMR spectrum of  $\text{mer-}[\text{Re}(\text{PyrrPNP}^t\text{Bu})(\text{CO})_3]^+$ ,  $[\mathbf{3}](\text{PF}_6)$  in  $\text{CD}_2\text{Cl}_2$ .

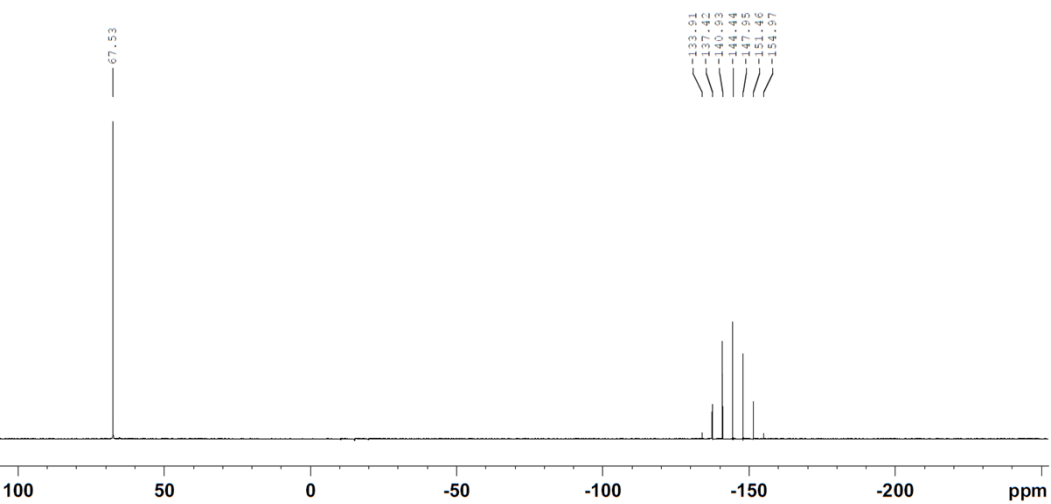

**Figure S 4:**  $^{31}\text{P}\{^1\text{H}\}$  NMR spectrum of  $\text{mer-}[\text{Re}(\text{Py}^*\text{PNP}^t\text{Bu})(\text{CO})_3]^+$ ,  $[\mathbf{3}](\text{PF}_6)$  in  $\text{CD}_2\text{Cl}_2$ .

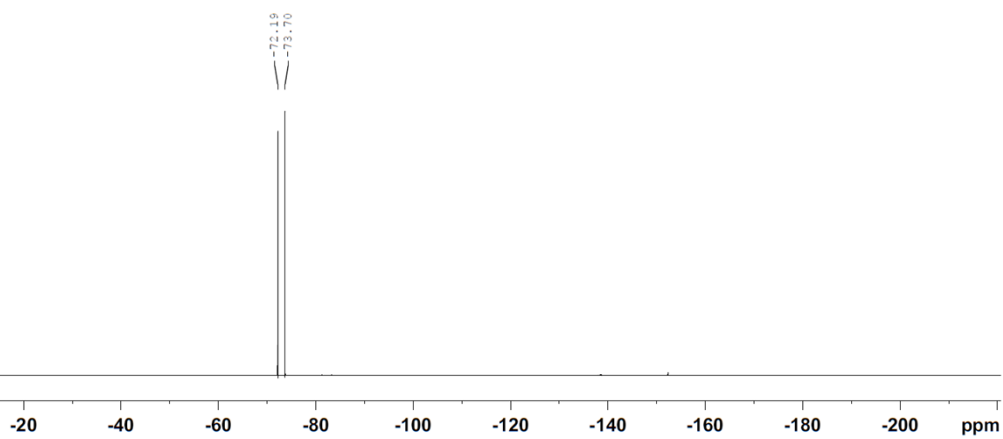

**Figure S 5:**  $^{19}\text{F}$  NMR spectrum of  $\text{mer-}[\text{Re}(\text{Py}^t\text{PNP}^t\text{Bu})(\text{CO})_3]^+$ ,  $[\mathbf{3}](\text{PF}_6)$  in  $\text{CD}_2\text{Cl}_2$ .

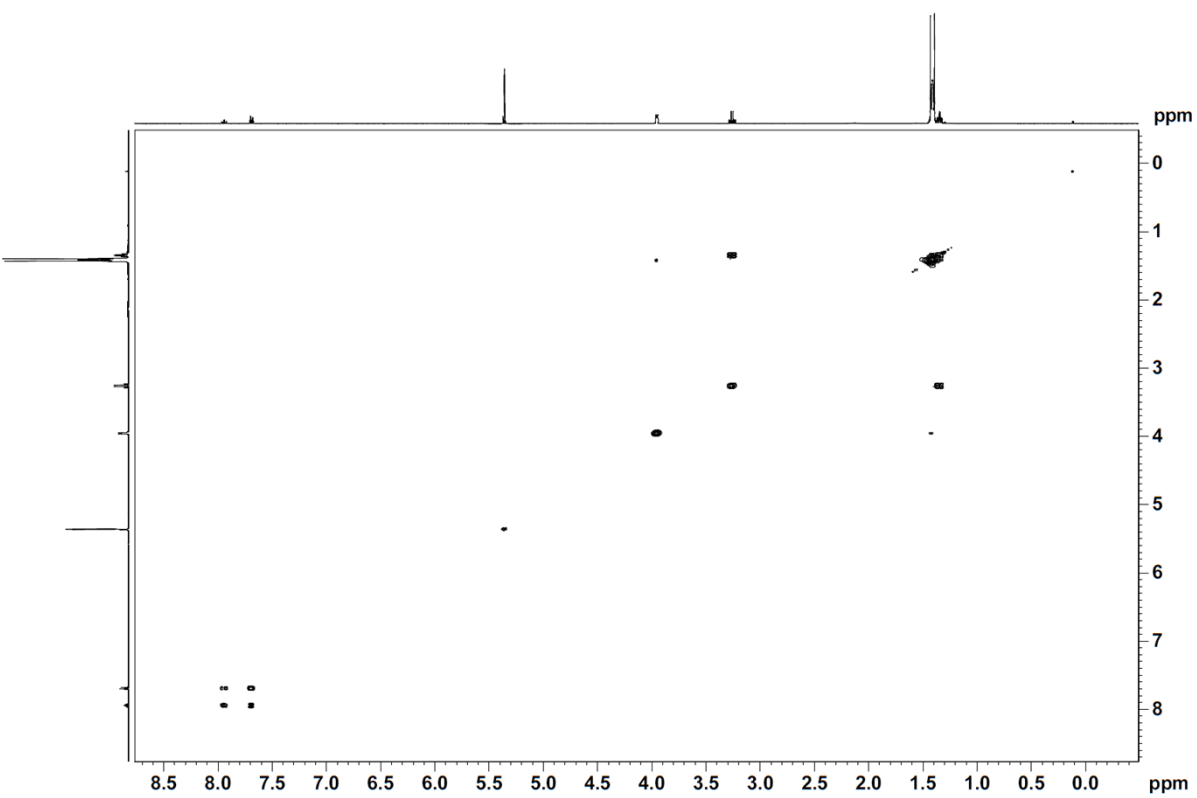

**Figure S 6:**  $^1\text{H}$ - $^1\text{H}$  COSY NMR spectrum of  $\text{mer-}[\text{Re}(\text{PyrrPNPrBu})(\text{CO})_3]^+$ ,  $[\mathbf{3}](\text{PF}_6)$  in  $\text{CD}_2\text{Cl}_2$ .

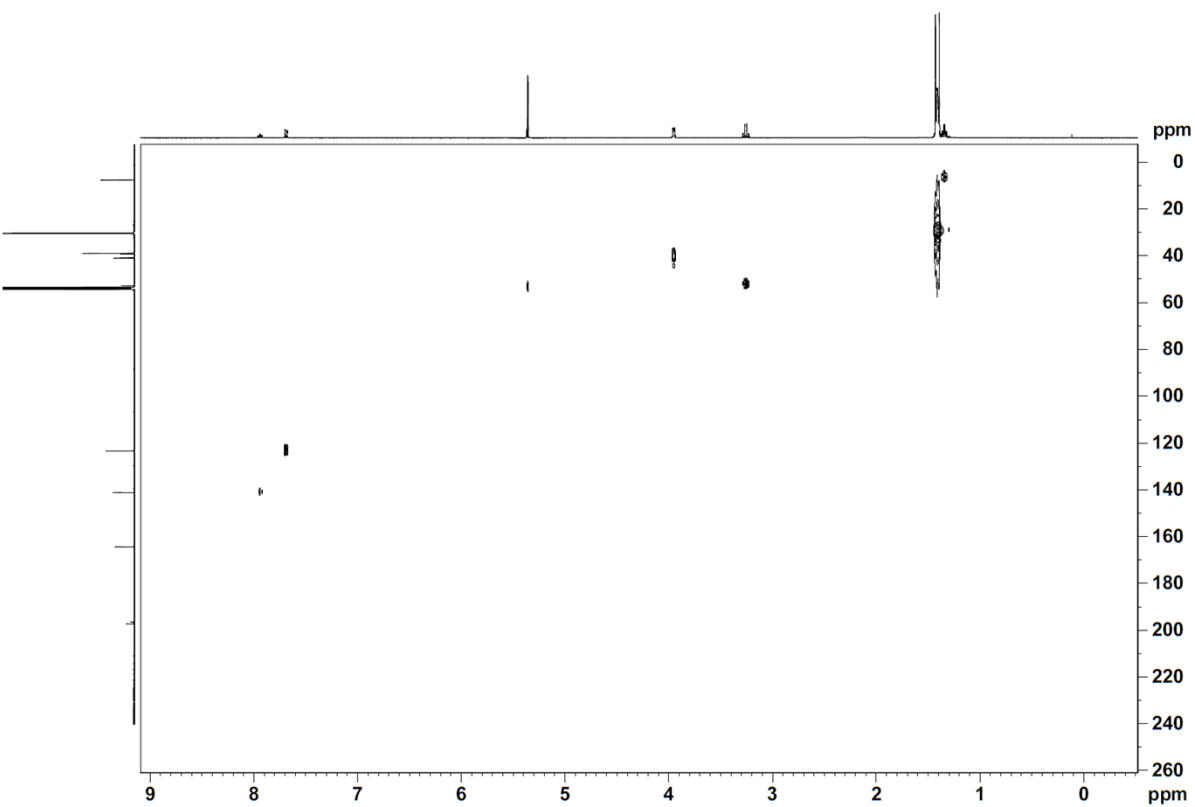

**Figure S 7:**  $^1\text{H}$ - $^{13}\text{C}$  HSQC NMR spectrum of  $\text{mer-}[\text{Re}(\text{Py}^t\text{PNNP}^t\text{Bu})(\text{CO})_3]^+$ ,  $[\mathbf{3}](\text{PF}_6)$  in  $\text{CD}_2\text{Cl}_2$ .



## 4.2 *mer*-[Re(<sup>Pyr</sup>PNP<sup>t</sup>Bu)(CO)<sub>3</sub>]<sup>+</sup>, [3](BF<sub>4</sub>)

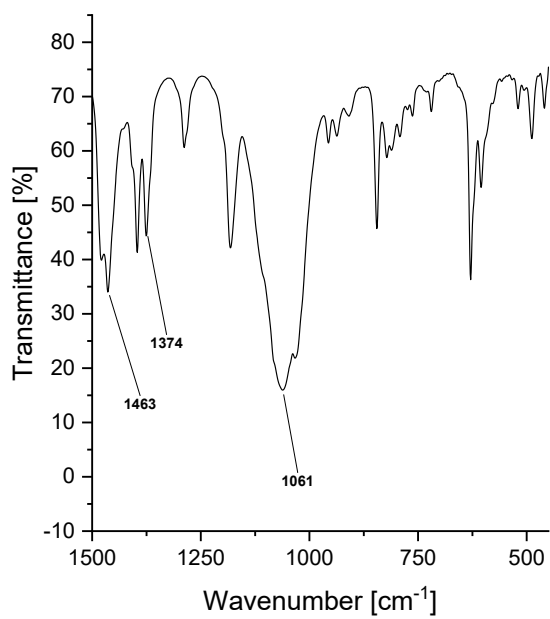

**Figure S 8:** Excerpt of IR spectrum (KBr) of *mer*-[Re(<sup>Pyr</sup>PNP<sup>t</sup>Bu)(CO)<sub>3</sub>]<sup>+</sup>, [3](BF<sub>4</sub>) showing vibrations of BF<sub>4</sub><sup>-</sup>.

### 4.3 *mer*-[Tc(<sup>Pyr</sup>PNP<sup>tBu</sup>)(CO)<sub>3</sub>]<sup>+</sup>, [5](PF<sub>6</sub>)

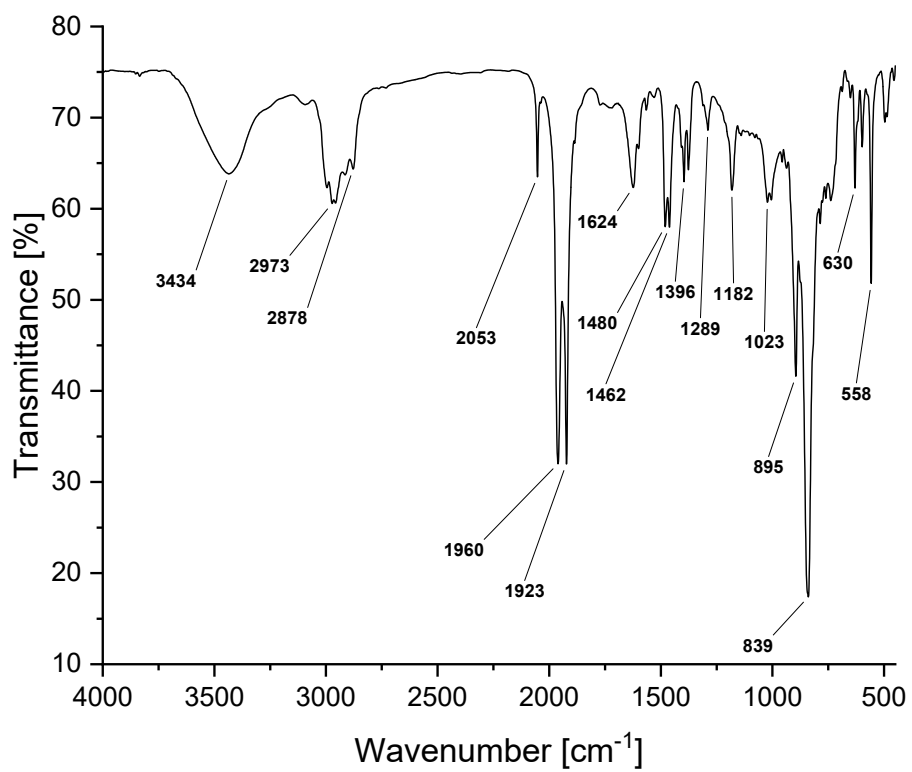

Figure S 9: IR spectrum (KBr) of *mer*-[Tc(<sup>Pyr</sup>PNP<sup>tBu</sup>)(CO)<sub>3</sub>]<sup>+</sup>, [5](PF<sub>6</sub>).

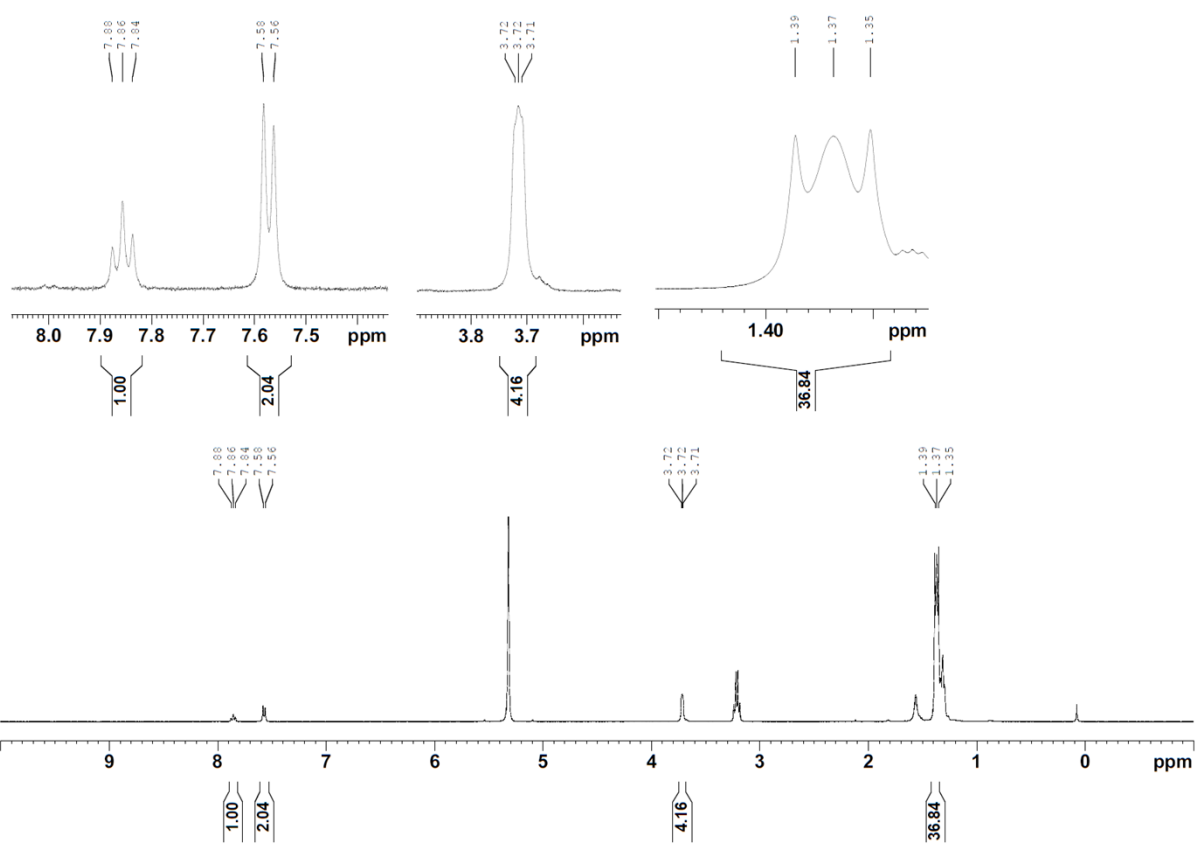

**Figure S 10:**  $^1\text{H}$  NMR spectrum of  $\text{mer-}[\text{Tc}(\text{Py}^r\text{PNPr}^t\text{Bu})(\text{CO})_3]^+$ ,  $[\mathbf{5}](\text{PF}_6)$  in  $\text{CD}_2\text{Cl}_2$ .

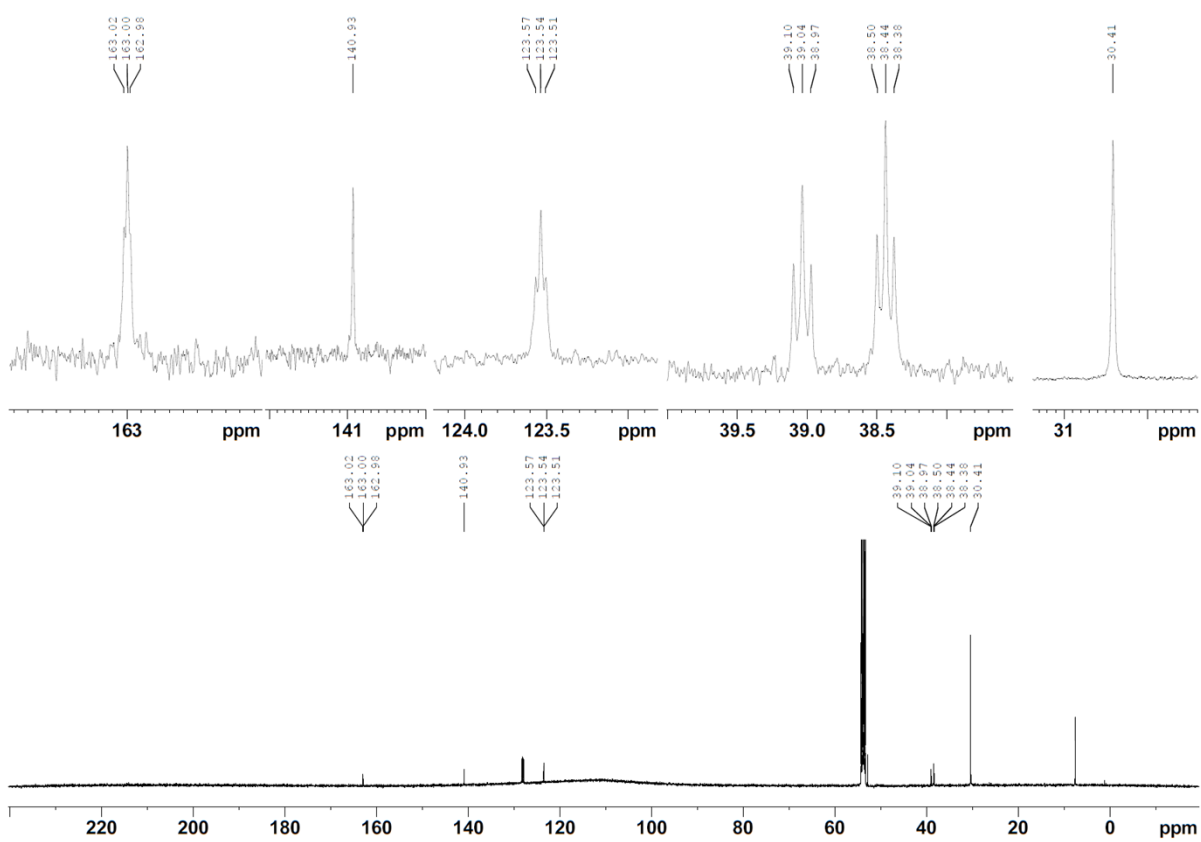

**Figure S 11:**  $^{13}\text{C}\{^1\text{H}\}$  NMR spectrum of  $\text{mer-}[\text{Tc}(\text{PyrPNP}^t\text{Bu})(\text{CO})_3]^+$ ,  $[\mathbf{5}](\text{PF}_6)$  in  $\text{CD}_2\text{Cl}_2$ .

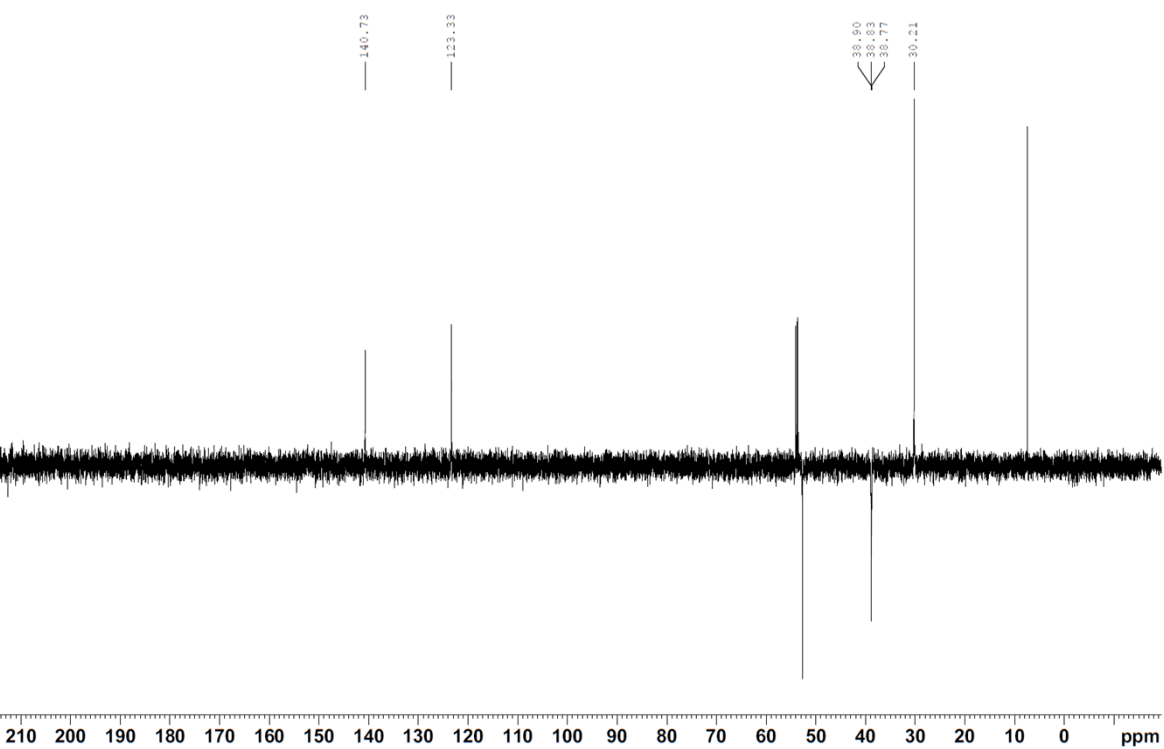

**Figure S 12:**  $^{13}\text{C}$  DEPT-135 NMR spectrum of *mer*-[Tc(<sup>Py</sup>rPNP<sup>t</sup>Bu)(CO)<sub>3</sub>]<sup>+</sup>, [5](PF<sub>6</sub>) in CD<sub>2</sub>Cl<sub>2</sub>.

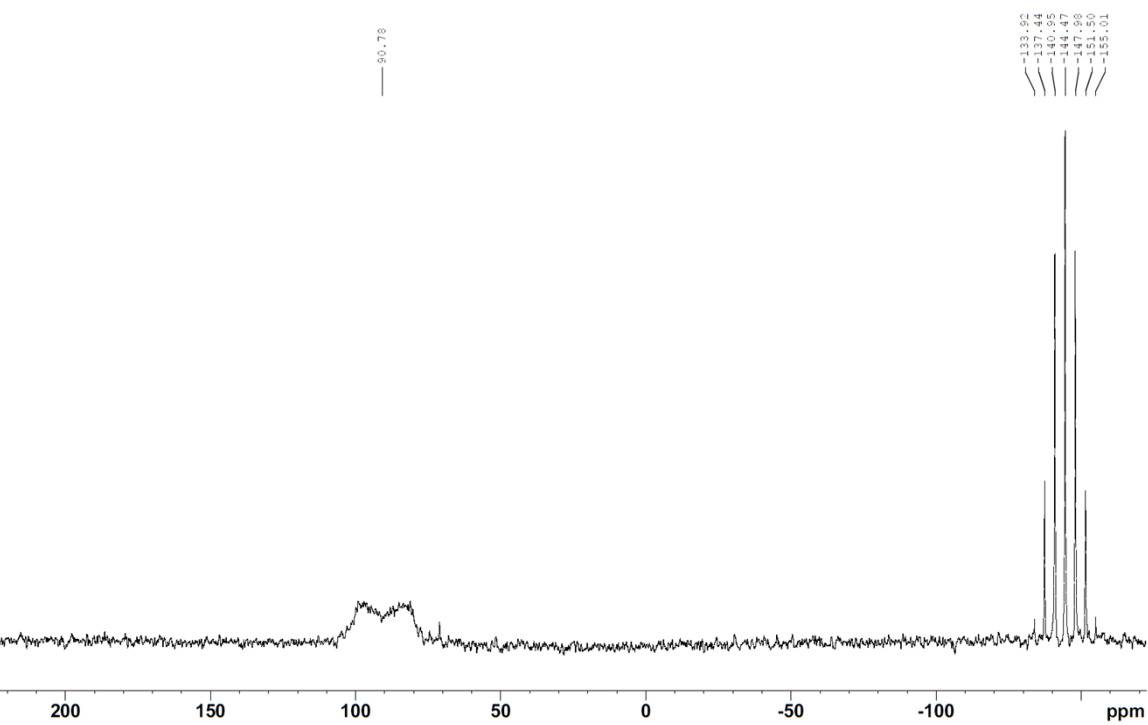

**Figure S 13:**  $^{31}\text{P}\{^1\text{H}\}$  NMR spectrum of  $\text{mer-}[\text{Tc}(\text{PyP}^t\text{Bu})(\text{CO})_3]^+$ ,  $[\mathbf{5}](\text{PF}_6)$  in  $\text{CD}_2\text{Cl}_2$ .

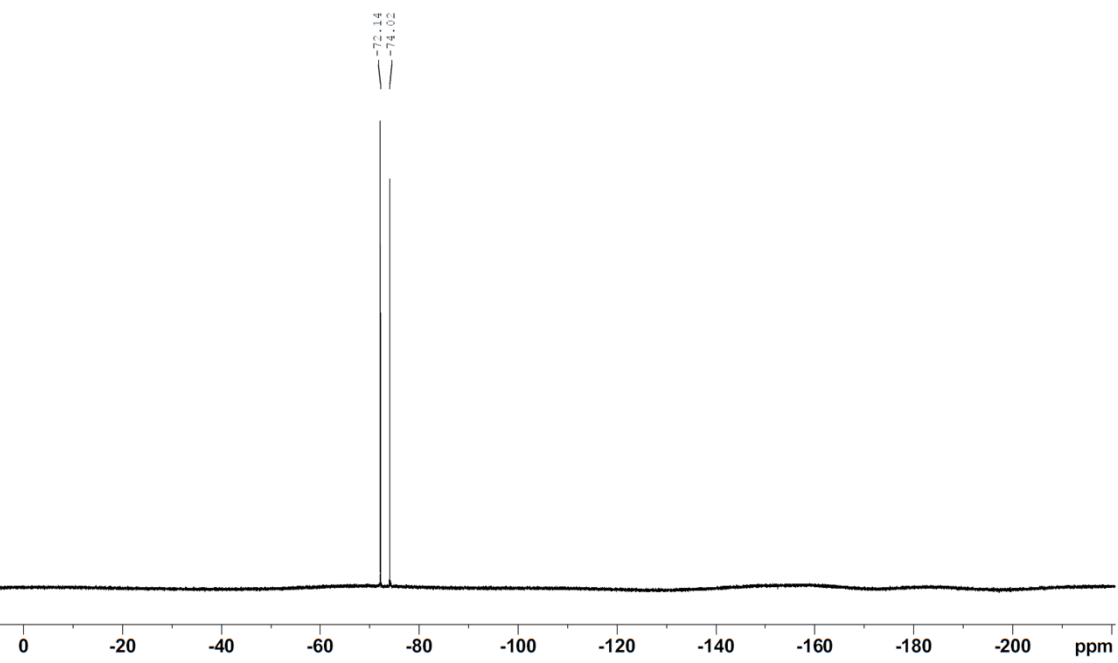

**Figure S 14:**  $^{19}\text{F}$  NMR spectrum of  $mer\text{-}[\text{Tc}(\text{PyF-PNP}^t\text{Bu})(\text{CO})_3]^+$ ,  $[\mathbf{5}](\text{PF}_6)$  in  $\text{CD}_2\text{Cl}_2$ .

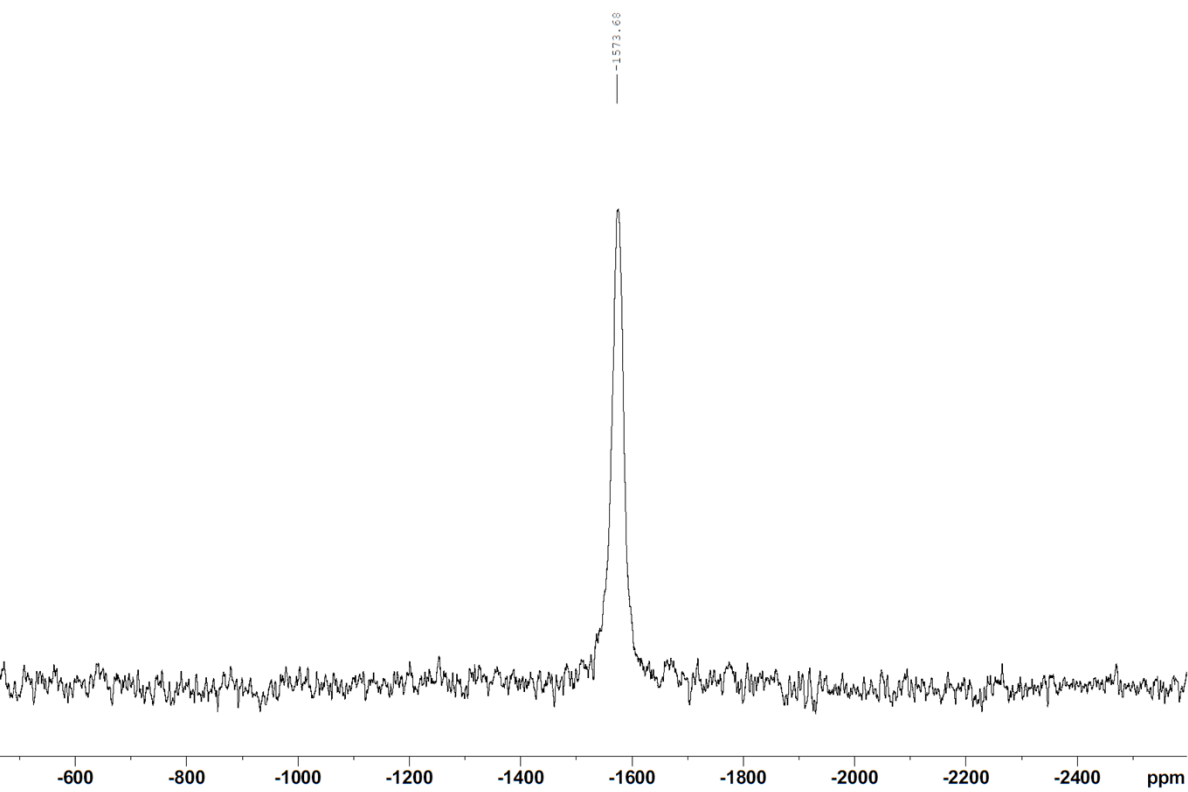

**Figure S 15:**  $^{99}\text{Tc}$  NMR spectrum of  $\text{mer-}[\text{Tc}(\text{PyrPNPrBu})(\text{CO})_3]^+$ ,  $[\mathbf{5}](\text{PF}_6)$  in  $\text{CD}_2\text{Cl}_2$ .



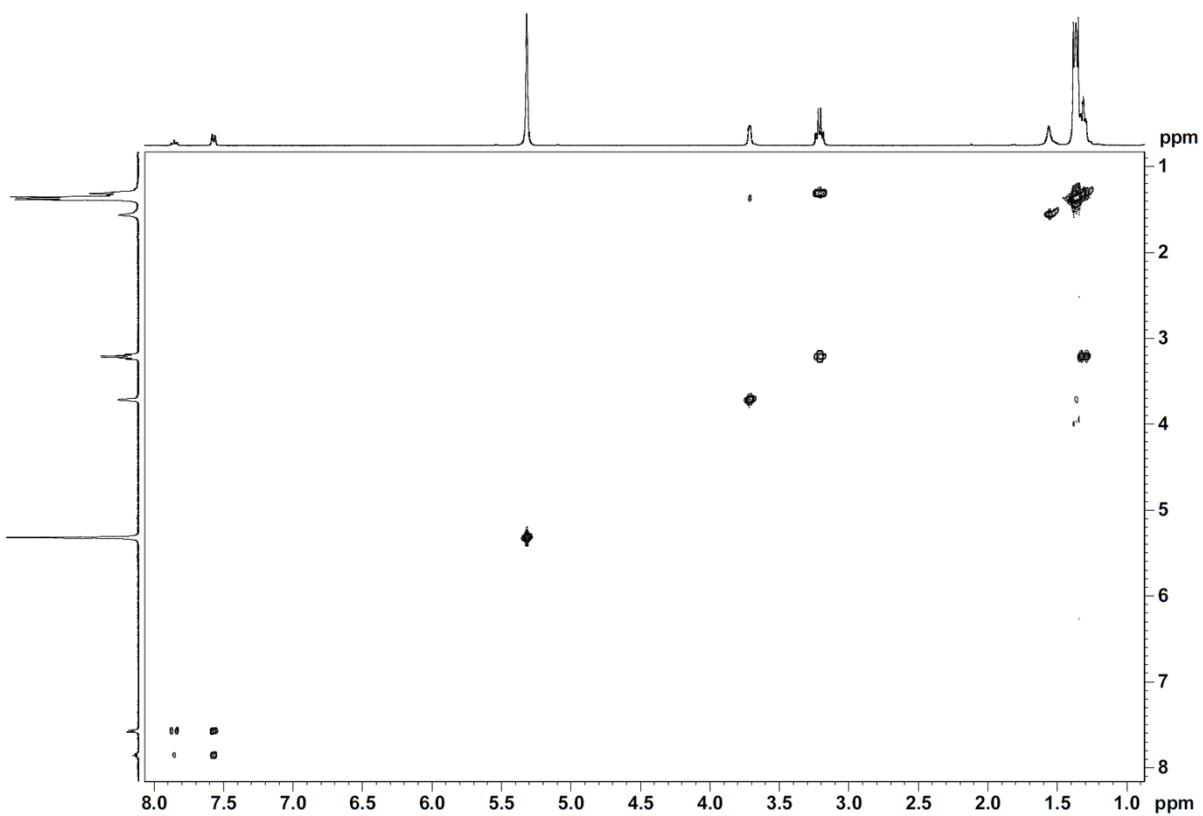

**Figure S 16:**  $^1\text{H}$ - $^1\text{H}$  COSY NMR spectrum of  $\text{mer-}[\text{Tc}(\text{PyPNP}^t\text{Bu})(\text{CO})_3]^+$ ,  $[\mathbf{5}](\text{PF}_6)$  in  $\text{CD}_2\text{Cl}_2$ .

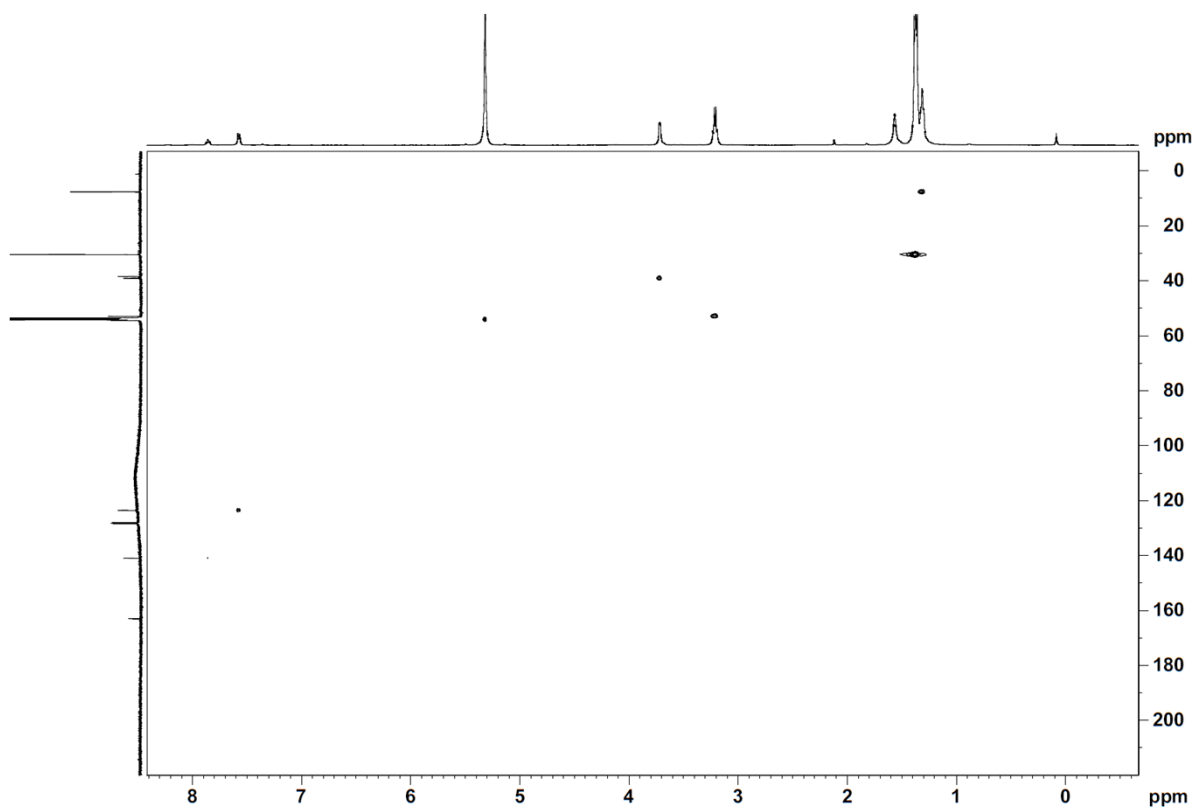

**Figure S 17:**  $^1\text{H}$ - $^{13}\text{C}$  HSQC NMR spectrum of  $\text{mer-}[\text{Tc}(\text{PyrrPNPrBu})(\text{CO})_3]^+$ ,  $[\mathbf{5}](\text{PF}_6)$  in  $\text{CD}_2\text{Cl}_2$ .

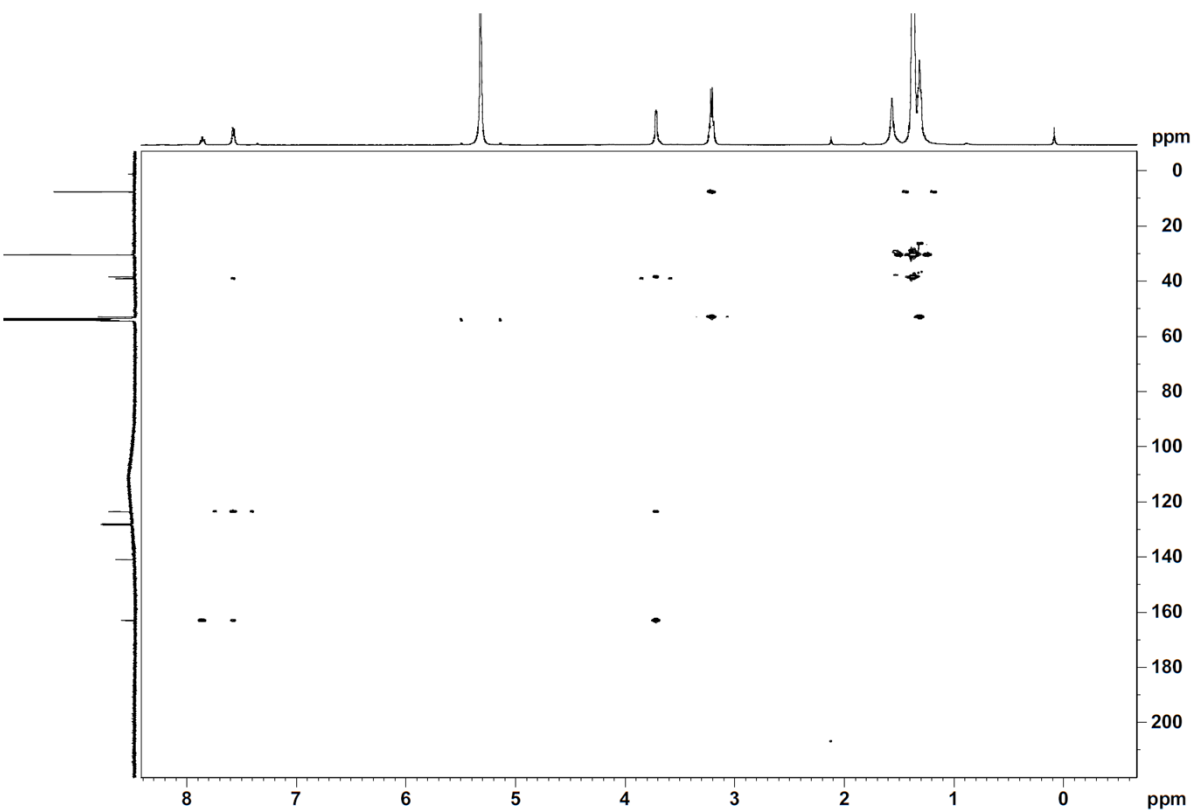

**Figure S 18:**  $^1\text{H}$ - $^{13}\text{C}$  HMBC NMR spectrum of  $\text{mer-}[\text{Tc}(\text{Py}^*\text{PNP}^t\text{Bu})(\text{CO})_3]^+$ ,  $[\mathbf{5}](\text{PF}_6)$  in  $\text{CD}_2\text{Cl}_2$ .

#### 4.4 $mer-[^{99m}\text{Tc}(\text{PyrPNP}^t\text{Bu})(\text{CO})_3], [7]^+$

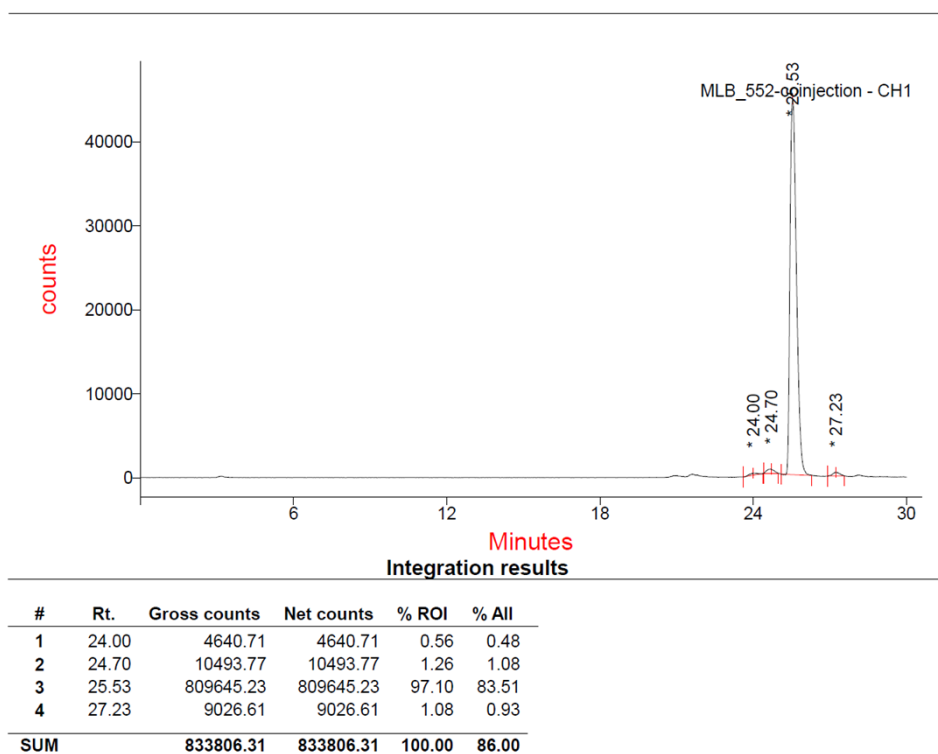

Figure S 19:  $\gamma$ -trace of  $mer-[^{99m}\text{Tc}(\text{PyrPNP}^t\text{Bu})(\text{CO})_3]^+, [7]^+$ .

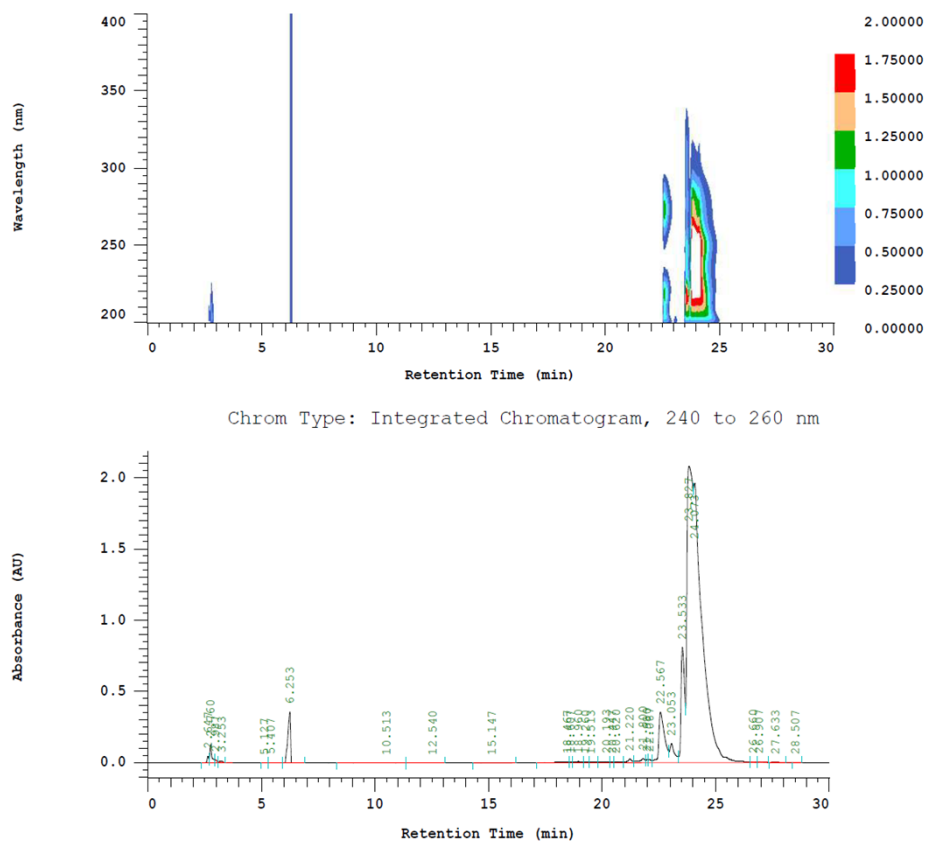

Figure S 20: UV-trace of  $mer-[Tc(\text{PyrPNP}^t\text{Bu})(\text{CO})_3]^+, [5]^+$ .

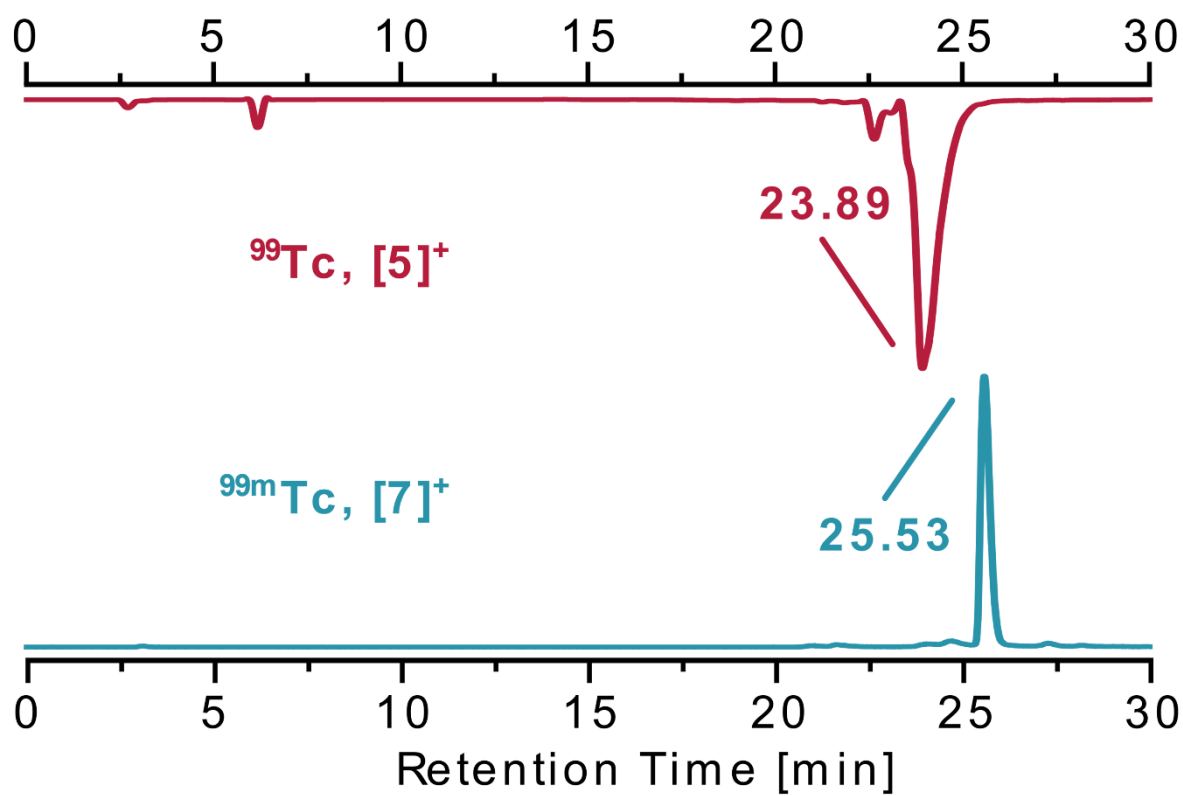

**Figure S 21:** HPLC traces for the coinjection of  $\text{mer-}[\text{Tc}(\text{PyrPnP}^{\text{rBu}})(\text{CO})_3]^+, [5]^+$  (top, UV-trace) with  $\text{mer-}[^{99\text{m}}\text{Tc}(\text{PyrPnP}^{\text{rBu}})(\text{CO})_3]^+, [7]^+$  (bottom,  $\gamma$ -trace).

#### 4.5 *fac*-[Re( $\kappa^2$ -terpy)(CO)<sub>3</sub>(PO<sub>2</sub>F<sub>2</sub>)], [9]

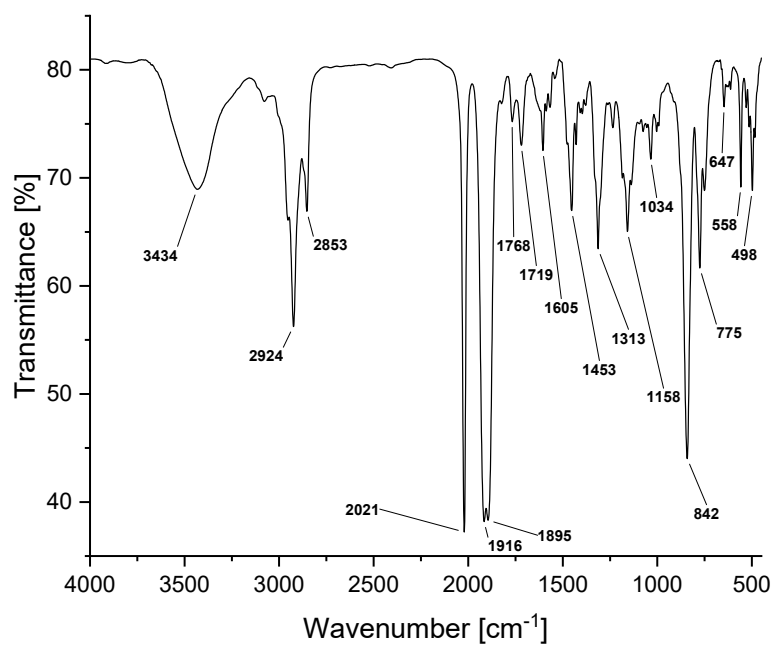

Figure S 22: IR spectrum (KBr) of *fac*-[Re( $\kappa^2$ -terpy)(CO)<sub>3</sub>(PO<sub>2</sub>F<sub>2</sub>)], [9].

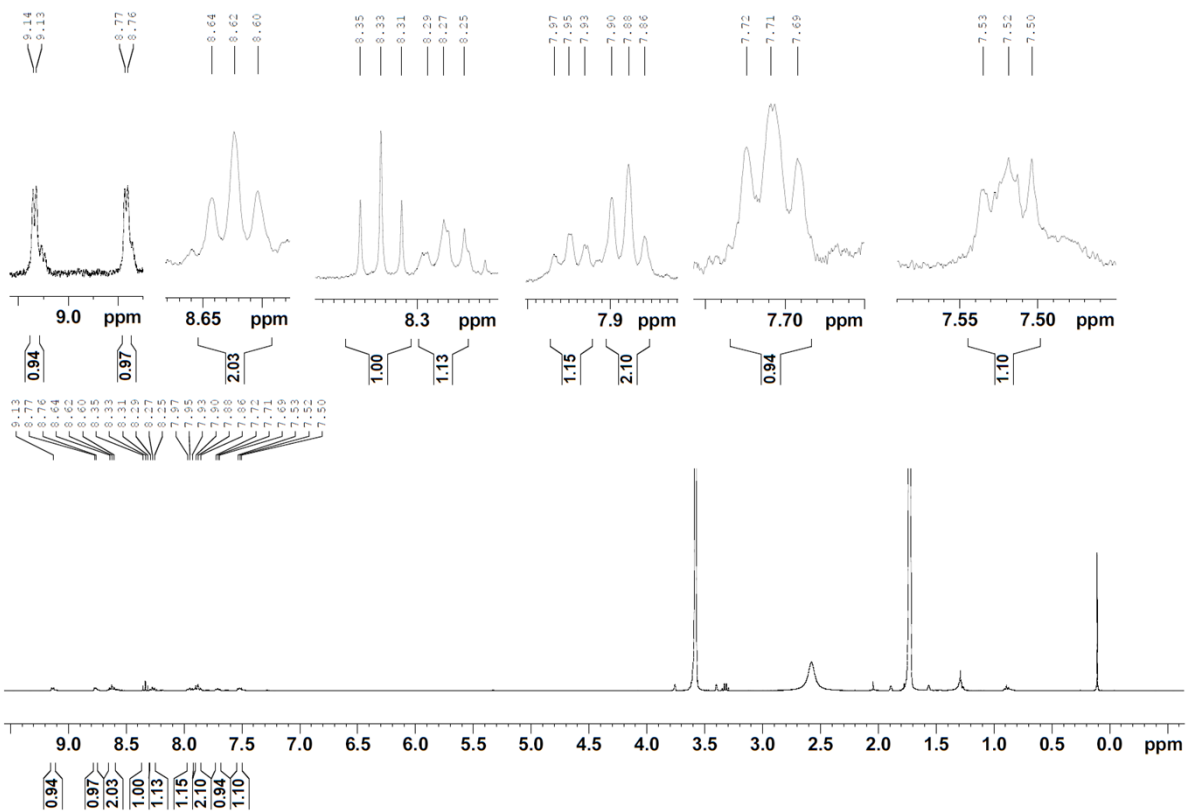

**Figure S 23:**  $^1\text{H}$  NMR spectrum of  $\text{fac-}[\text{Re}(\kappa^2\text{-terpy})(\text{CO})_3(\text{PO}_2\text{F}_2)]$ , [9] in  $\text{THF-}d_8$ .

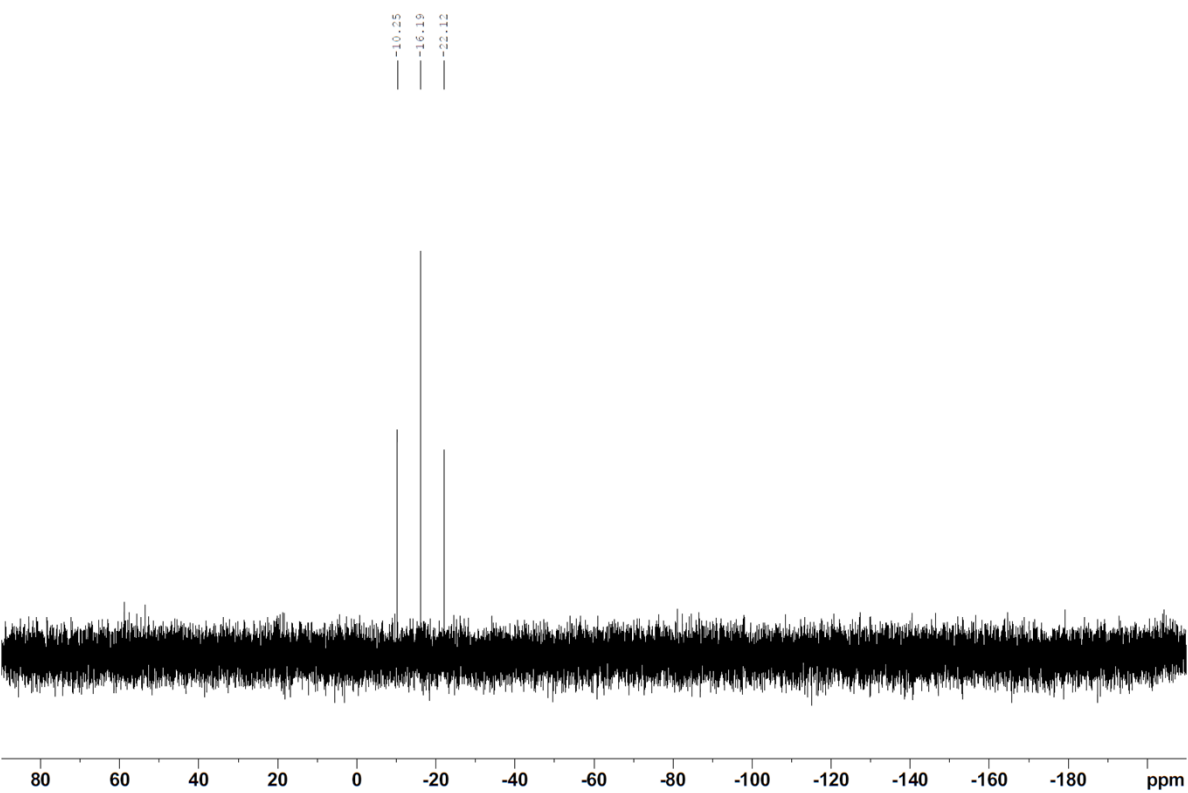

**Figure S 24:**  $^{31}\text{P}\{^1\text{H}\}$  NMR spectrum of *fac*- $[\text{Re}(\kappa^2\text{-terpy})(\text{CO})_3(\text{PO}_2\text{F}_2)]$ , [9] in  $\text{THF-}d_8$ .



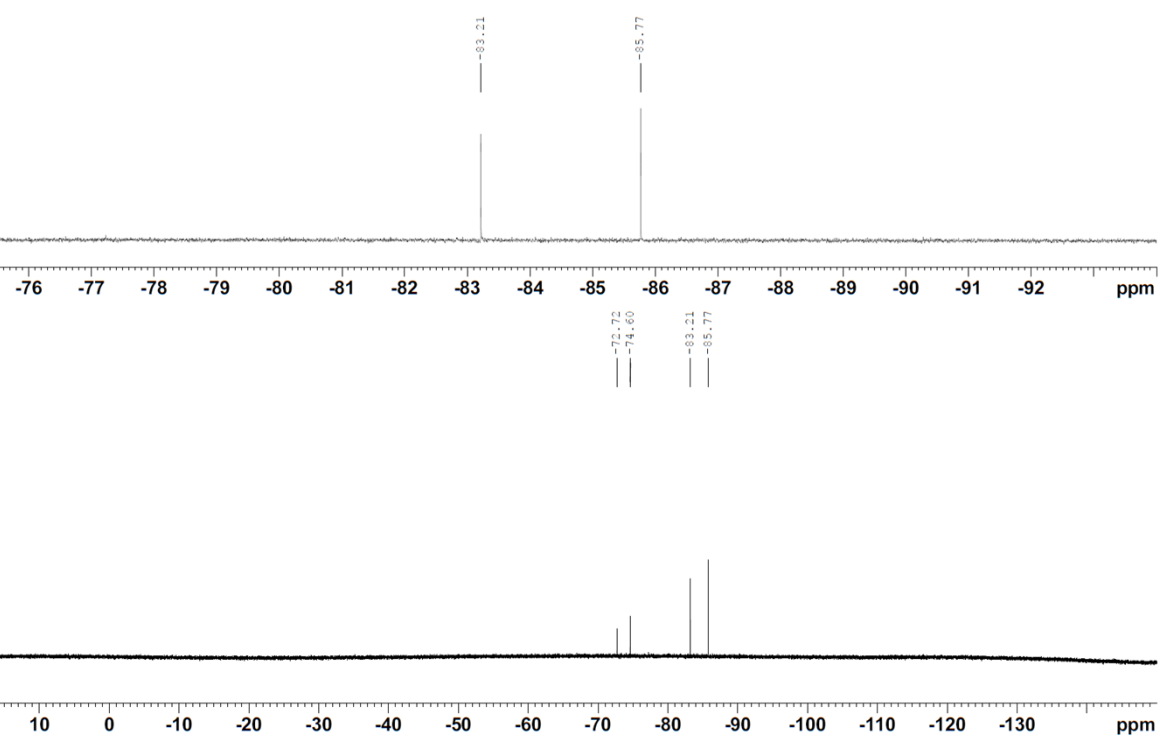

**Figure S 25:**  $^{19}\text{F}\{^1\text{H}\}$  NMR spectrum of  $\text{fac-}[\text{Re}(\kappa^2\text{-terpy})(\text{CO})_3(\text{PO}_2\text{F}_2)]$ , [9] in  $\text{THF-}d_8$ .

#### 4.6 $\text{fac-}[\text{Re}(\kappa^2\text{-terpy})(\text{CO})_3\text{Br}]$ , [10]

Data in agreement with literature.<sup>[14]</sup>

#### 4.7 *fac*-[Tc( $\kappa^2$ -terpy)(CO)<sub>3</sub>Cl], [11]

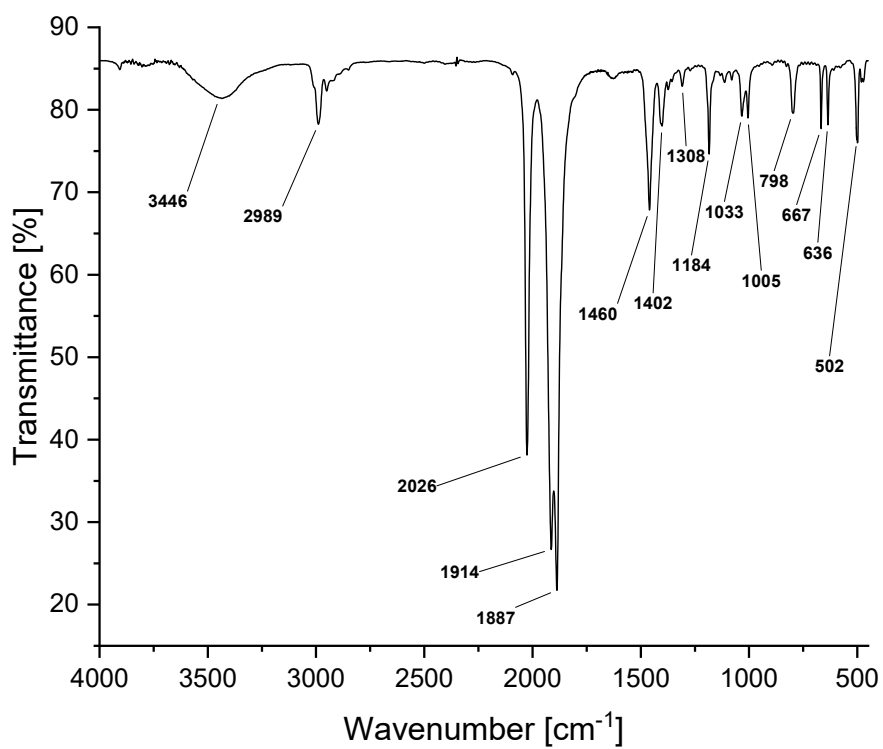

Figure S 26: IR spectrum (KBr) of *fac*-[Tc( $\kappa^2$ -terpy)(CO)<sub>3</sub>Cl], [11].

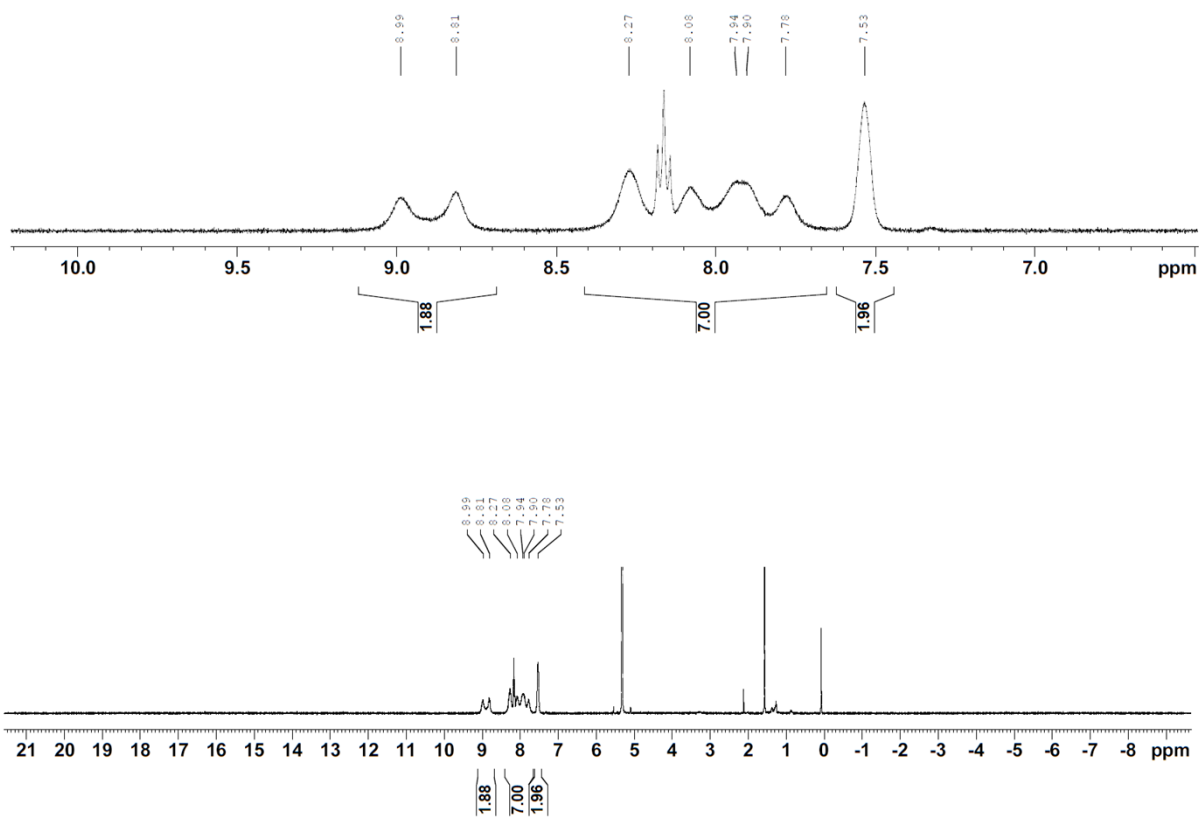

Figure S 27: <sup>1</sup>H NMR spectrum of *fac*-[Tc( $\kappa^2$ -terpy)(CO)<sub>3</sub>Cl], [11] at 298 K in CD<sub>2</sub>Cl<sub>2</sub>.

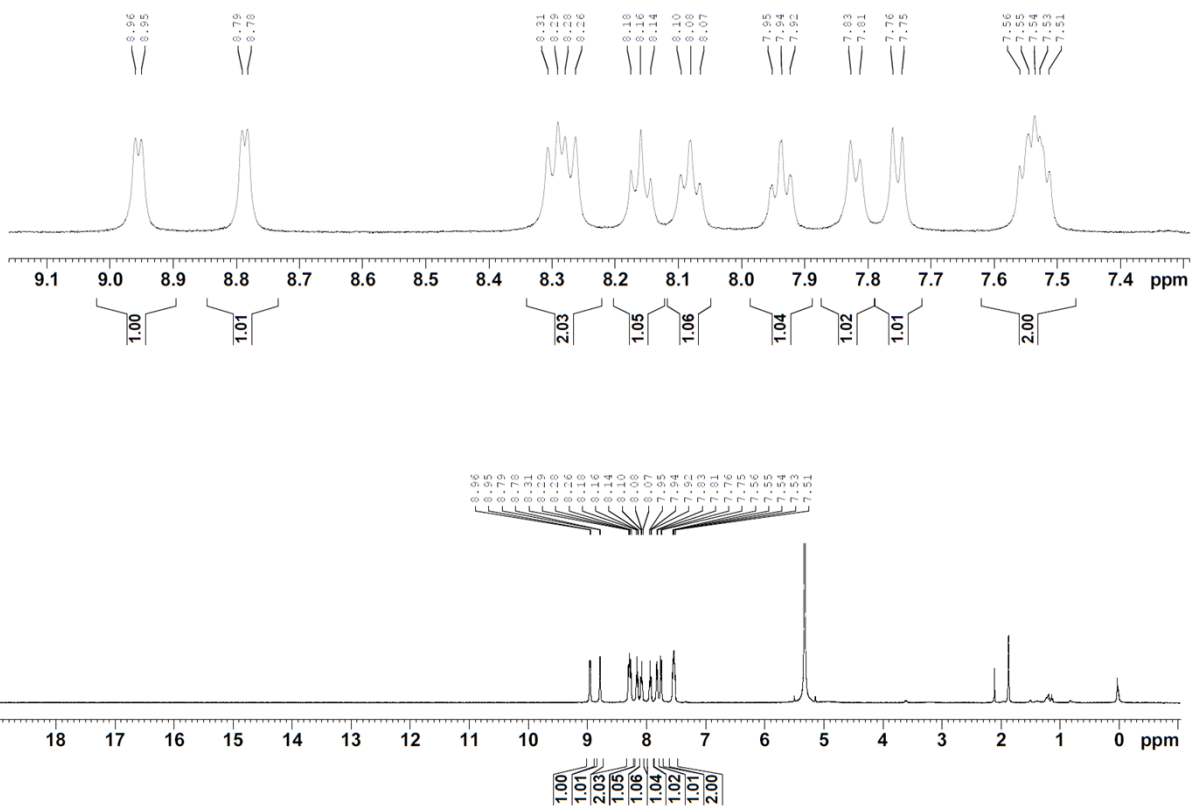

**Figure S 28:** <sup>1</sup>H NMR spectrum of *fac*-[Tc( $\kappa^2$ -terpy)(CO)<sub>3</sub>Cl], [**11**] at 235 K in CD<sub>2</sub>Cl<sub>2</sub>.

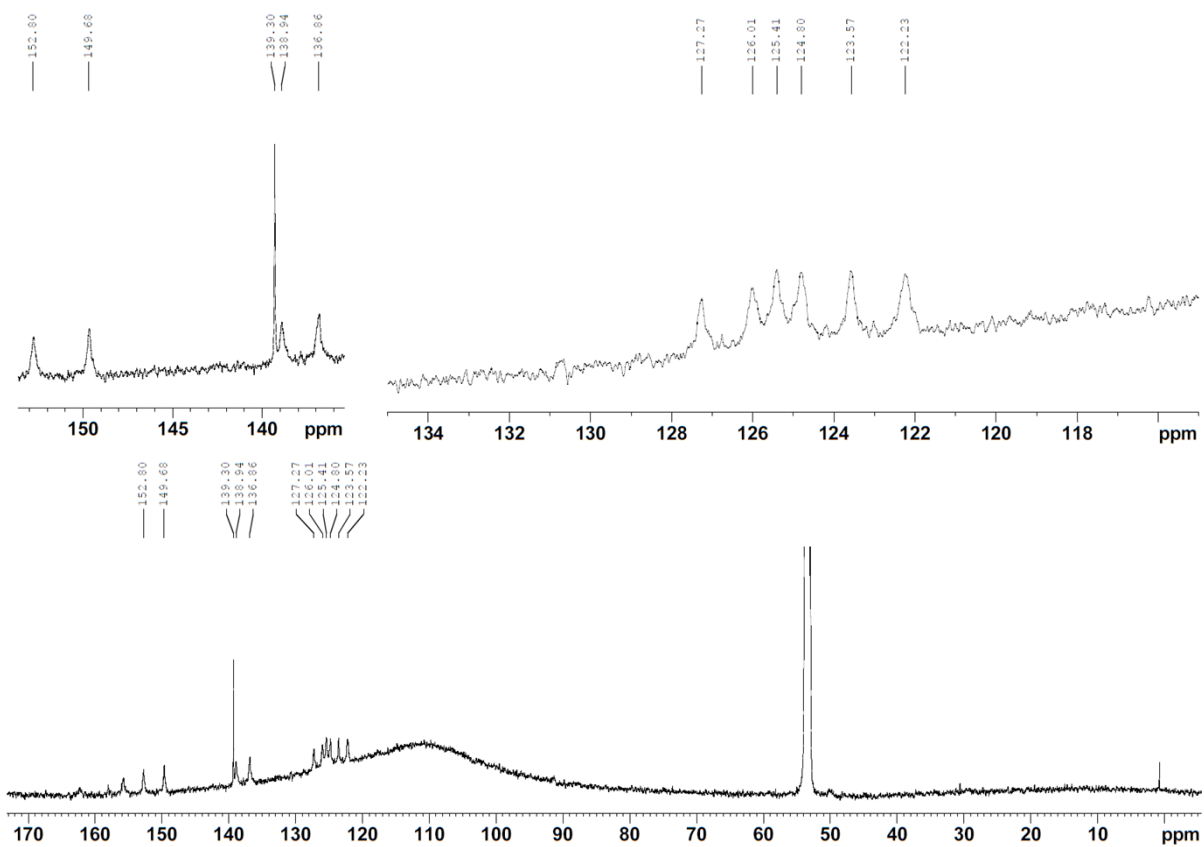

**Figure S 29:**  $^{13}\text{C}\{^1\text{H}\}$  NMR spectrum of *fac*-[Tc( $\kappa^2$ -terpy)(CO)<sub>3</sub>Cl], [11] at 298 K in CD<sub>2</sub>Cl<sub>2</sub>.

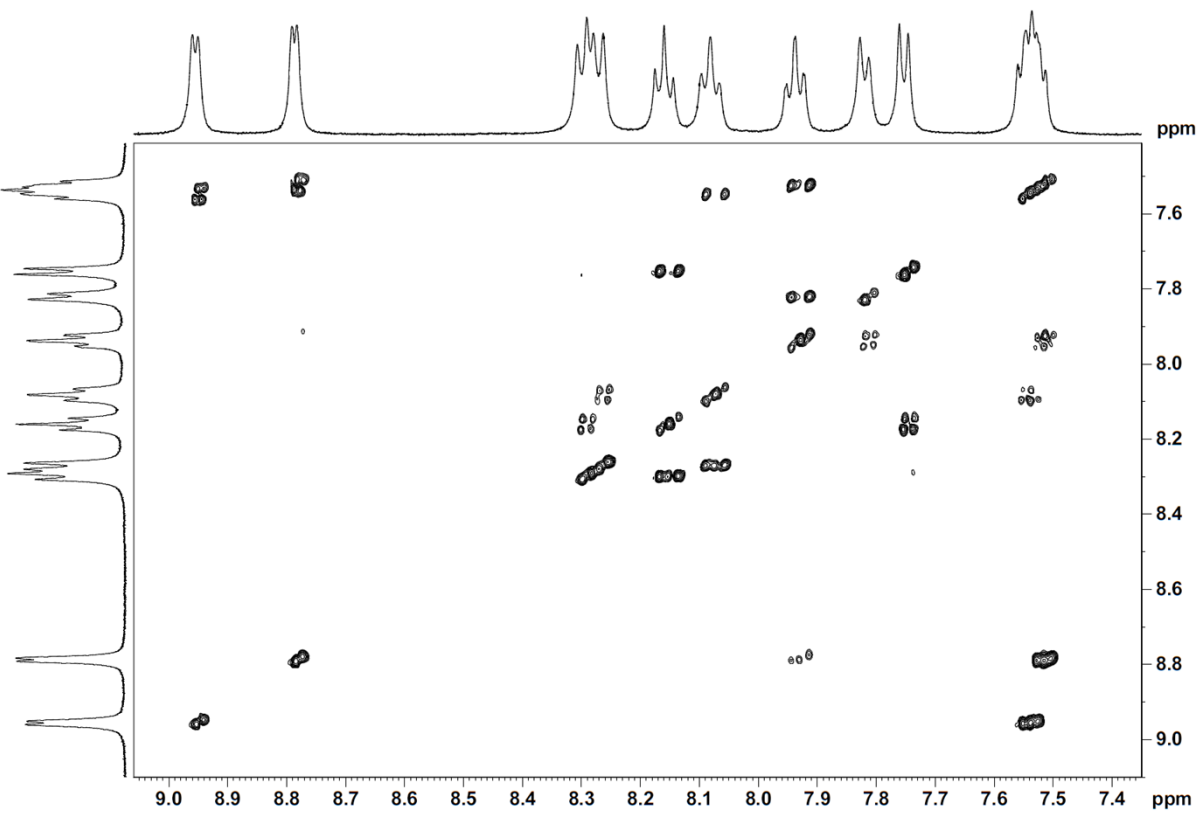

**Figure S 30:** <sup>1</sup>H-<sup>1</sup>H COSY NMR spectrum of *fac*-[Tc( $\kappa^2$ -terpy)(CO)<sub>3</sub>Cl], [**11**] at 235 K in CD<sub>2</sub>Cl<sub>2</sub>.

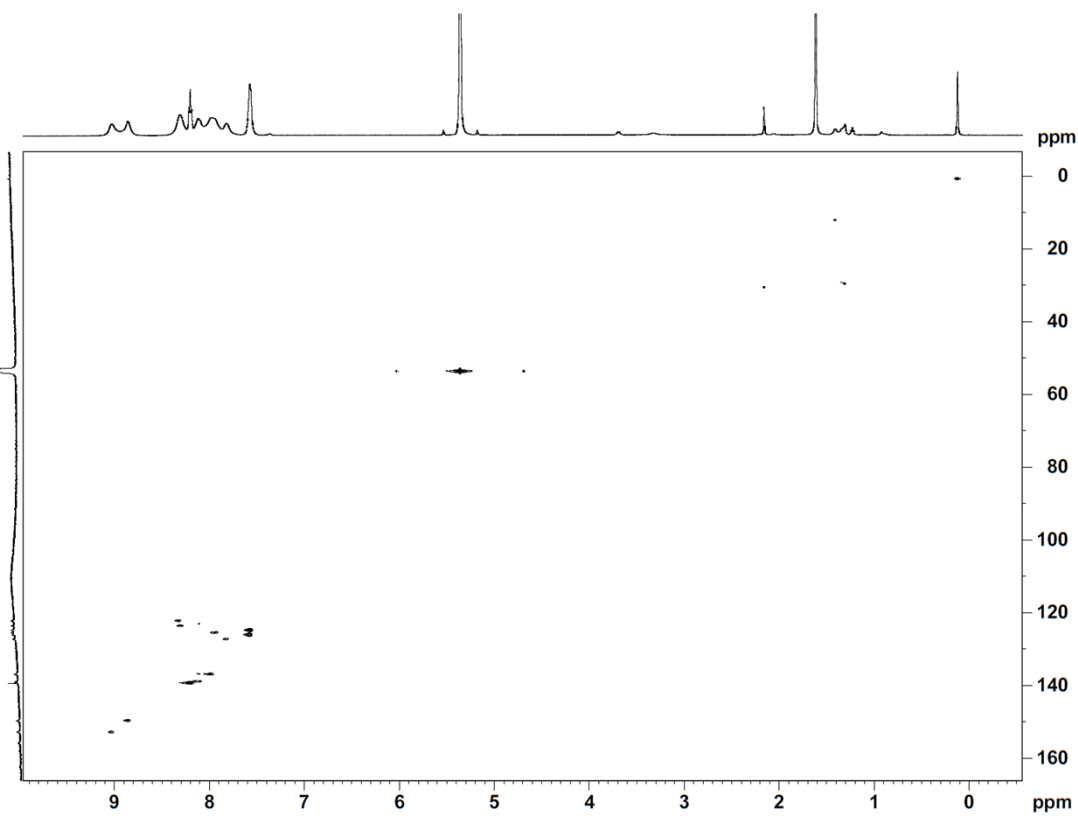

**Figure S 31:**  $^1\text{H}$ - $^{13}\text{C}$  HSQC NMR spectrum of *fac*- $[\text{Tc}(\kappa^2\text{-terpy})(\text{CO})_3\text{Cl}]$ , [11] at 298 K in  $\text{CD}_2\text{Cl}_2$ .

## 5 Crystallographic Data

CCDC entries 2307669-2307674 contain the supplementary crystallographic data for this paper. These data are provided free of charge by The Cambridge Crystallographic Data Centre via [www.ccdc.cam.ac.uk/structures](http://www.ccdc.cam.ac.uk/structures).

### 5.1 2,6-bis((di-tertbutylphosphino)methyl)pyridine (PyrPNP<sup>t</sup>Bu) (2)

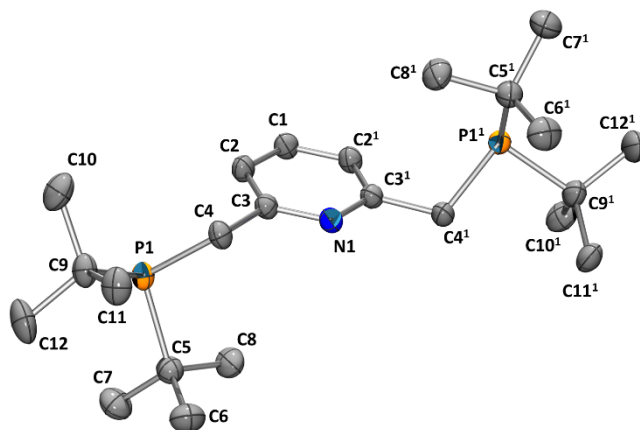

**Figure S32:** Ellipsoid displacement plot<sup>[15]</sup> of PyrPNP<sup>t</sup>Bu (2). Ellipsoids represent 35% probability. Hydrogen atoms are omitted for clarity. Molecule has been prepared according to literature procedure (c.f. *General Experimental Details*).<sup>[5]</sup>

**Table S1:** Tabulated values of selected bond lengths and angles in the crystal structure of (2).

|       | Selected bond lengths |                       | Selected bond angles |
|-------|-----------------------|-----------------------|----------------------|
| P1–C4 | 1.8611(16) Å          | C4–P1–C5              | 102.50(8)°           |
| P1–C5 | 1.8900(19) Å          | C4–P1–C9              | 99.47(8)°            |
| P1–C9 | 1.8891(18) Å          | C5–P1–C9              | 110.92(9)°           |
| N1–C3 | 1.3438(18) Å          | C3–N1–C3 <sup>1</sup> | 118.30(19)°          |
| C1–C2 | 1.383(2) Å            | C2–C1–C2 <sup>1</sup> | 119.2(2)°            |
| C2–C3 | 1.390(2) Å            | N1–C3–C2              | 122.47(15)°          |
| C3–C4 | 1.510(2) Å            | C1–C2–C3              | 118.79(16)°          |



**Table S2:** Crystallographic data of  $\text{PyrPNP}^{\text{rBu}}$  (**2**).

|                                                   |                                                               |
|---------------------------------------------------|---------------------------------------------------------------|
| Empirical formula                                 | $\text{C}_{23}\text{H}_{43}\text{NP}_2$                       |
| Formula weight                                    | 395.52                                                        |
| Diffractometer                                    | <i>Rigaku XtaLAB Synergy, Dualflex, HyPix</i>                 |
| Radiation                                         | $\text{CuK}\alpha$ ( $\lambda = 1.54184 \text{ \AA}$ )        |
| Temperature [K]                                   | 160                                                           |
| Crystal system                                    | monoclinic                                                    |
| Space group                                       | $C2/c$                                                        |
| a [ $\text{\AA}$ ]                                | 15.9398(4)                                                    |
| b [ $\text{\AA}$ ]                                | 6.2656(2)                                                     |
| c [ $\text{\AA}$ ]                                | 25.0585(8)                                                    |
| $\alpha$ [ $^\circ$ ]                             | 90                                                            |
| $\beta$ [ $^\circ$ ]                              | 96.419(3)                                                     |
| $\gamma$ [ $^\circ$ ]                             | 90                                                            |
| Volume [ $\text{\AA}^3$ ]                         | 2486.96(13)                                                   |
| Z                                                 | 4                                                             |
| $\rho_{\text{calc}}$ [ $\text{g/cm}^3$ ]          | 1.056                                                         |
| $\mu$ [ $\text{mm}^{-1}$ ]                        | 1.613                                                         |
| F(000)                                            | 872.0                                                         |
| Crystal size [ $\text{mm}^3$ ]                    | $0.125 \times 0.08 \times 0.071$                              |
| Crystal description                               | clear, yellowish colorless block                              |
| $2\theta$ range for data collection [ $^\circ$ ]  | 2.9 to 78.8                                                   |
| Index ranges                                      | $-20 \leq h \leq 17, -7 \leq k \leq 7, -30 \leq l \leq 32$    |
| Reflections collected                             | 10581                                                         |
| Independent reflections                           | 2652 [ $R_{\text{int}} = 0.0409, R_{\text{sigma}} = 0.0284$ ] |
| Reflections observed                              | 2456                                                          |
| Criterion for observation                         | $I > 2\sigma(I)$                                              |
| Completeness to theta                             | 97.2% to $81.330^\circ$                                       |
| Absorption correction                             | gaussian                                                      |
| Min./max. transmission                            | 0.769/1.000                                                   |
| Data/restraints/parameters                        | 2652/0/125                                                    |
| Goodness-of-fit on $F^2$                          | 1.079                                                         |
| Final R indexes [ $I \geq 2\sigma(I)$ ]           | $R_1 = 0.0563, wR_2 = 0.1482$                                 |
| Final R indexes [all data]                        | $R_1 = 0.0583, wR_2 = 0.1508$                                 |
| Largest diff. peak/hole / [ $\text{e \AA}^{-3}$ ] | 0.58/-0.46                                                    |

## 5.2 *mer*-[Re(<sup>Pyr</sup>PNP<sup>tBu</sup>)(CO)<sub>3</sub>]<sup>+</sup>, [3](PF<sub>6</sub>)

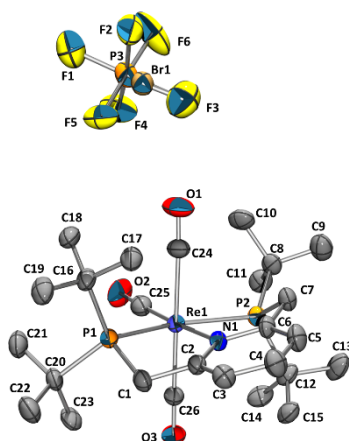

**Figure S33:** Ellipsoid displacement plot<sup>[15]</sup> of *mer*-[Re(<sup>Pyr</sup>PNP<sup>tBu</sup>)(CO)<sub>3</sub>](PF<sub>6</sub>) ([3](PF<sub>6</sub>)). Ellipsoids represent 35% probability. Hydrogen atoms are omitted for clarity.

**Table S3:** Tabulated values of selected bond lengths and angles in the crystal structure of [3](PF<sub>6</sub>).

|         | Selected bond lengths |             | Selected bond angles |
|---------|-----------------------|-------------|----------------------|
| Re1–P1  | 2.4431(18) Å          | P1–Re1–P2   | 159.03(7)°           |
| Re1–P2  | 2.4565(17) Å          | P1–Re1–N1   | 79.41(14)°           |
| Re1–N1  | 2.215(5) Å            | P2–Re1–N1   | 79.63(14)°           |
| Re1–C24 | 2.017(8) Å            | P1–Re1–C24  | 91.5(2)°             |
| Re1–C25 | 1.921(11) Å           | P1–Re1–C25  | 100.3(3)°            |
| Re1–C26 | 1.998(7) Å            | P1–Re1–C26  | 90.2(2)°             |
| C24–O1  | 1.095(10) Å           | C24–Re1–C25 | 87.9(4)°             |
| C25–O2  | 1.163(12) Å           | C25–Re1–C26 | 90.5(3)°             |
| C26–O3  | 1.105(9) Å            | C24–Re1–C26 | 177.9(3)°            |

**Table S4:** Crystallographic data of *mer*-[Re(<sup>Py</sup>rPNP<sup>tBu</sup>)(CO)<sub>3</sub>](PF<sub>6</sub>) (**3**)(PF<sub>6</sub>).

|                                                |                                                                                                           |
|------------------------------------------------|-----------------------------------------------------------------------------------------------------------|
| Empirical formula                              | C <sub>26</sub> H <sub>43</sub> Br <sub>0.28</sub> F <sub>4.34</sub> NO <sub>3</sub> P <sub>2.73</sub> Re |
| Formula weight                                 | 792.54                                                                                                    |
| Diffractometer                                 | Rigaku OD XtaLAB Synergy, Dualflex, Pilatus 200K                                                          |
| Radiation                                      | CuK $\alpha$ ( $\lambda$ = 1.54184 Å)                                                                     |
| Temperature [K]                                | 160                                                                                                       |
| Crystal system                                 | triclinic                                                                                                 |
| Space group                                    | <i>P</i> $\bar{1}$                                                                                        |
| a [Å]                                          | 8.4694 (2)                                                                                                |
| b [Å]                                          | 12.7901 (2)                                                                                               |
| c [Å]                                          | 15.8962 (3)                                                                                               |
| $\alpha$ [°]                                   | 105.675(2)                                                                                                |
| $\beta$ [°]                                    | 104.744(2)                                                                                                |
| $\gamma$ [°]                                   | 92.815(2)                                                                                                 |
| Volume [Å <sup>3</sup> ]                       | 1590.42 (6)                                                                                               |
| Z                                              | 2                                                                                                         |
| $\rho_{\text{calc}}$ [g/cm <sup>3</sup> ]      | 1.655                                                                                                     |
| $\mu$ [mm <sup>-1</sup> ]                      | 9.636                                                                                                     |
| F(000)                                         | 789.0                                                                                                     |
| Crystal size [mm <sup>3</sup> ]                | 0.068 × 0.047 × 0.021                                                                                     |
| Crystal description                            | plate, yellowish                                                                                          |
| 2 $\theta$ range for data collection [°]       | 6.012 to 159.956                                                                                          |
| Index ranges                                   | -10 ≤ h ≤ 10, -16 ≤ k ≤ 16, -20 ≤ l ≤ 20                                                                  |
| Reflections collected                          | 57628                                                                                                     |
| Independent reflections                        | 6827 [ $R_{\text{int}}$ = 0.0817, $R_{\text{sigma}}$ = 0.0316]                                            |
| Reflections observed                           | 6199                                                                                                      |
| Criterion for observation                      | I > 2 $\sigma$ (I)                                                                                        |
| Completeness to theta                          | 98.3% to 79.978°                                                                                          |
| Absorption correction                          | gaussian                                                                                                  |
| Min./max. transmission                         | 0.484/0.845                                                                                               |
| Data/restraints/parameters                     | 6827/12/384                                                                                               |
| Goodness-of-fit on F <sup>2</sup>              | 1.082                                                                                                     |
| Final R indexes [I >= 2 $\sigma$ (I)]          | $R_1$ = 0.0558, $wR_2$ = 0.1477                                                                           |
| Final R indexes [all data]                     | $R_1$ = 0.0609, $wR_2$ = 0.1523                                                                           |
| Largest diff. peak/hole / [e Å <sup>-3</sup> ] | 1.54/-2.98                                                                                                |

Note: The PF<sub>6</sub><sup>-</sup> counterion is disordered with Br<sup>-</sup> at an occupancy of 0.28.

### 5.3 *mer*-[Re(<sup>Pyr</sup>PNP<sup>tBu</sup>)(CO)<sub>3</sub>]<sup>+</sup>, [3](BF<sub>4</sub>)

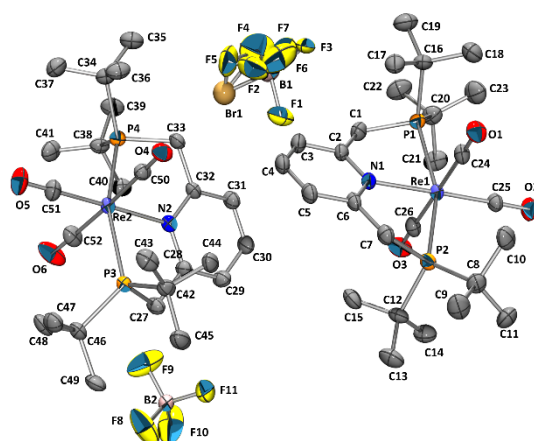

**Figure S34:** Ellipsoid displacement plot<sup>[15]</sup> of *mer*-[Re(<sup>Pyr</sup>PNP<sup>tBu</sup>)(CO)<sub>3</sub>](BF<sub>4</sub>) ([3](BF<sub>4</sub>)). Ellipsoids represent 35% probability. Hydrogen atoms are omitted for clarity.

**Table S5:** Tabulated values of selected bond lengths and angles in the crystal structure of [3](BF<sub>4</sub>).

| Selected bond lengths |              | Selected bond angles |             |
|-----------------------|--------------|----------------------|-------------|
| Re1–P1                | 2.4454(12) Å | P1–Re1–P2            | 158.30(4)°  |
| Re1–P2                | 2.4477(12) Å | P1–Re1–N1            | 79.28(11)°  |
| Re1–N1                | 2.200(4) Å   | P2–Re1–N1            | 79.03(11)°  |
| Re1–C24               | 2.004(5) Å   | P1–Re1–C24           | 90.82(16)°  |
| Re1–C25               | 1.925(5) Å   | P1–Re1–C25           | 100.88(16)° |
| Re1–C26               | 1.975(5) Å   | P1–Re1–C26           | 88.12(16)°  |
| C24–O1                | 1.117(7) Å   | C24–Re1–C25          | 90.3(2)°    |
| C25–O2                | 1.140(6) Å   | C25–Re1–C26          | 89.8(2)°    |
| C26–O3                | 1.145(6) Å   | C24–Re1–C26          | 178.9(2)°   |

**Table S6:** Crystallographic data of *mer*-[Re(<sup>Py</sup>rPNP<sup>t</sup>Bu)(CO)<sub>3</sub>](BF<sub>4</sub>) (**3**)(BF<sub>4</sub>).

|                                                |                                                                                                                                                    |
|------------------------------------------------|----------------------------------------------------------------------------------------------------------------------------------------------------|
| Empirical formula                              | C <sub>52</sub> H <sub>86</sub> B <sub>1.95</sub> Br <sub>0.05</sub> F <sub>7.8</sub> N <sub>2</sub> O <sub>6</sub> P <sub>4</sub> Re <sub>2</sub> |
| Formula weight                                 | 1504.78                                                                                                                                            |
| Diffractometer                                 | Rigaku OD XtaLAB Synergy, Dualflex, Pilatus<br>200K                                                                                                |
| Radiation                                      | CuKα (λ = 1.54184 Å)                                                                                                                               |
| Temperature [K]                                | 160                                                                                                                                                |
| Crystal system                                 | triclinic                                                                                                                                          |
| Space group                                    | <i>P</i> $\bar{1}$                                                                                                                                 |
| a [Å]                                          | 8.87921 (7)                                                                                                                                        |
| b [Å]                                          | 12.57039 (13)                                                                                                                                      |
| c [Å]                                          | 27.5441 (2)                                                                                                                                        |
| α [°]                                          | 85.4844 (7)                                                                                                                                        |
| β [°]                                          | 89.7211 (6)                                                                                                                                        |
| γ [°]                                          | 89.6147 (8)                                                                                                                                        |
| Volume [Å <sup>3</sup> ]                       | 3064.69 (5)                                                                                                                                        |
| Z                                              | 2                                                                                                                                                  |
| ρ <sub>calc</sub> [g/cm <sup>3</sup> ]         | 1.631                                                                                                                                              |
| μ [mm <sup>-1</sup> ]                          | 9.226                                                                                                                                              |
| F(000)                                         | 1503.0                                                                                                                                             |
| Crystal size [mm <sup>3</sup> ]                | 0.082 × 0.072 × 0.035                                                                                                                              |
| Crystal description                            | plate, yellow                                                                                                                                      |
| 2θ range for data collection [°]               | 6.438 to 159.324                                                                                                                                   |
| Index ranges                                   | -11 ≤ h ≤ 11, -15 ≤ k ≤ 15, -35 ≤ l ≤ 34                                                                                                           |
| Reflections collected                          | 81167                                                                                                                                              |
| Independent reflections                        | 12861 [R <sub>int</sub> = 0.0586, R <sub>sigma</sub> = 0.0286]                                                                                     |
| Reflections observed                           | 11547                                                                                                                                              |
| Criterion for observation                      | I > 2σ (I)                                                                                                                                         |
| Completeness to theta                          | 99.6% to 79.662°                                                                                                                                   |
| Absorption correction                          | gaussian                                                                                                                                           |
| Min./max. transmission                         | 0.270/0.698                                                                                                                                        |
| Data/restraints/parameters                     | 12861/48/740                                                                                                                                       |
| Goodness-of-fit on F <sup>2</sup>              | 1.086                                                                                                                                              |
| Final R indexes [I >= 2σ (I)]                  | R <sub>1</sub> = 0.0383, wR <sub>2</sub> = 0.1040                                                                                                  |
| Final R indexes [all data]                     | R <sub>1</sub> = 0.0420, wR <sub>2</sub> = 0.1063                                                                                                  |
| Largest diff. peak/hole / [e Å <sup>-3</sup> ] | 1.14/-2.39                                                                                                                                         |

Note: One of the BF<sub>4</sub><sup>-</sup> counterions is disordered with Br<sup>-</sup> at an occupancy of 0.05.

## 5.4 *mer*-[Tc(<sup>Pyr</sup>PNP<sup>tBu</sup>)(CO)<sub>3</sub>]<sup>+</sup>, [5](PF<sub>6</sub>)

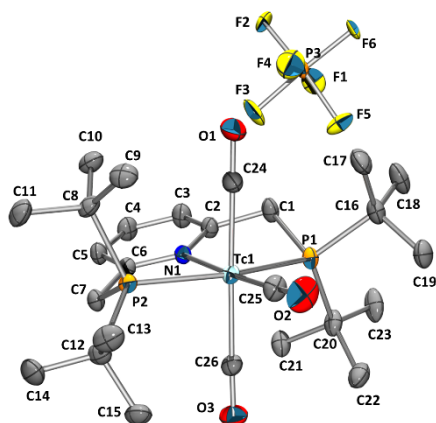

**Figure S35:** Ellipsoid displacement plot<sup>[15]</sup> of *mer*-[Tc(<sup>Pyr</sup>PNP<sup>tBu</sup>)(CO)<sub>3</sub>](PF<sub>6</sub>) ([5](PF<sub>6</sub>)). Ellipsoids represent 35% probability. Hydrogen atoms are omitted for clarity.

**Table S7:** Tabulated values of selected bond lengths and angles in the crystal structure of [5](PF<sub>6</sub>).

| Selected bond lengths |              | Selected bond angles |             |
|-----------------------|--------------|----------------------|-------------|
| Tc1–P1                | 2.4578(10) Å | P1–Tc1–P2            | 159.76(4)°  |
| Tc1–P2                | 2.4495(10) Å | P1–Tc1–N1            | 80.02(9)°   |
| Tc1–N1                | 2.206(3) Å   | P2–Tc1–N1            | 79.75(9)°   |
| Tc1–C24               | 1.993(5) Å   | P1–Tc1–C24           | 88.34(14)°  |
| Tc1–C25               | 1.917(5) Å   | P1–Tc1–C25           | 100.76(16)° |
| Tc1–C26               | 1.988(5) Å   | P1–Tc1–C26           | 90.68(13)°  |
| C24–O1                | 1.118(6) Å   | C24–Tc1–C25          | 88.2(2)°    |
| C25–O2                | 1.144(6) Å   | C25–Tc1–C26          | 90.6(2)°    |
| C26–O3                | 1.122(6) Å   | C24–Tc1–C26          | 178.35(18)° |

**Table S8:** Crystallographic data of *mer*-[Tc(<sup>Py</sup>rPNP<sup>tBu</sup>)(CO)<sub>3</sub>](PF<sub>6</sub>) (**5**)(PF<sub>6</sub>).

|                                                   |                                                                                                        |
|---------------------------------------------------|--------------------------------------------------------------------------------------------------------|
| Empirical formula                                 | C <sub>26</sub> H <sub>43</sub> Cl <sub>0.4</sub> F <sub>3.6</sub> NO <sub>3</sub> P <sub>2.6</sub> Tc |
| Formula weight                                    | 678.71                                                                                                 |
| Diffractometer                                    | Rigaku OD XtaLAB Synergy, Dualflex, Pilatus 200K                                                       |
| Radiation                                         | CuK $\alpha$ ( $\lambda = 1.54184 \text{ \AA}$ )                                                       |
| Temperature [K]                                   | 160                                                                                                    |
| Crystal system                                    | triclinic                                                                                              |
| Space group                                       | <i>P</i> $\bar{1}$                                                                                     |
| a [ $\text{\AA}$ ]                                | 8.38590 (10)                                                                                           |
| b [ $\text{\AA}$ ]                                | 12.89050 (10)                                                                                          |
| c [ $\text{\AA}$ ]                                | 15.67840 (10)                                                                                          |
| $\alpha$ [ $^\circ$ ]                             | 106.0060 (10)                                                                                          |
| $\beta$ [ $^\circ$ ]                              | 103.6810 (10)                                                                                          |
| $\gamma$ [ $^\circ$ ]                             | 92.6590 (10)                                                                                           |
| Volume [ $\text{\AA}^3$ ]                         | 1571.54 (3)                                                                                            |
| Z                                                 | 2                                                                                                      |
| $\rho_{\text{calc}}$ [g/cm <sup>3</sup> ]         | 1.434                                                                                                  |
| $\mu$ [mm <sup>-1</sup> ]                         | 5.705                                                                                                  |
| F(000)                                            | 702.0                                                                                                  |
| Crystal size [mm <sup>3</sup> ]                   | 0.13 $\times$ 0.096 $\times$ 0.041                                                                     |
| Crystal description                               | plate, yellow                                                                                          |
| 2 $\theta$ range for data collection [ $^\circ$ ] | 6.072 to 158.478                                                                                       |
| Index ranges                                      | -10 $\leq$ h $\leq$ 10, -16 $\leq$ k $\leq$ 16, -18 $\leq$ l $\leq$ 19                                 |
| Reflections collected                             | 63888                                                                                                  |
| Independent reflections                           | 6773 [ $R_{\text{int}} = 0.0556$ , $R_{\text{sigma}} = 0.0201$ ]                                       |
| Reflections observed                              | 6637                                                                                                   |
| Criterion for observation                         | I $>$ 2 $\sigma$ (I)                                                                                   |
| Completeness to theta                             | 99.9% to 79.239 $^\circ$                                                                               |
| Absorption correction                             | gaussian                                                                                               |
| Min./max. transmission                            | 0.700/1.000                                                                                            |
| Data/restraints/parameters                        | 6773/4/377                                                                                             |
| Goodness-of-fit on F <sup>2</sup>                 | 1.056                                                                                                  |
| Final R indexes [I $\geq$ 2 $\sigma$ (I)]         | R <sub>1</sub> = 0.0555, wR <sub>2</sub> = 0.1747                                                      |
| Final R indexes [all data]                        | R <sub>1</sub> = 0.0560, wR <sub>2</sub> = 0.1753                                                      |
| Largest diff. peak/hole / [e $\text{\AA}^{-3}$ ]  | 2.83/-1.08                                                                                             |

Note: The PF<sub>6</sub><sup>-</sup> counterion is disordered with Cl<sup>-</sup> at an occupancy of 0.40, omitted in Figure S35.

## 5.5 *fac*-[Re( $\kappa^2$ -terpy)(CO)<sub>3</sub>(PO<sub>2</sub>F<sub>2</sub>)], [9]

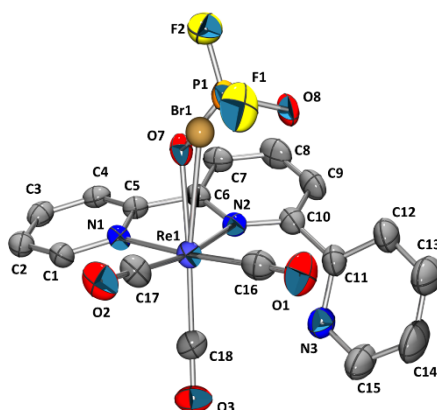

**Figure S36:** Ellipsoid displacement plot<sup>[15]</sup> of *fac*-[Re( $\kappa^2$ -terpy)(CO)<sub>3</sub>(PO<sub>2</sub>F<sub>2</sub>)] [9]. Ellipsoids represent 35% probability. Hydrogen atoms are omitted for clarity. The unit cell contains both the shown isomer, while the second isomer is omitted for clarity.

**Table S9:** Tabulated values of selected bond lengths and angles in the crystal structure of [9].

|         | Selected bond lengths |             | Selected bond angles |
|---------|-----------------------|-------------|----------------------|
| Re1–N1  | 2.165(5) Å            | N1–Re1–N2   | 74.98(19)°           |
| Re1–N2  | 2.215(5) Å            | N1–Re1–C16  | 175.5(3)°            |
| Re1–C16 | 1.915(9) Å            | N1–Re1–C17  | 96.5(3)°             |
| Re1–C17 | 1.906(7) Å            | N1–Re1–C18  | 94.5(3)°             |
| Re1–C18 | 1.900(8) Å            | N1–Re1–O7   | 79.6(2)°             |
| Re1–O7  | 2.167(6) Å            | O7–P1–O8    | 108.8(3)°            |
| C16–O1  | 1.169(10) Å           | C16–Re1–C17 | 87.3(3)°             |
| C17–O2  | 1.146(9) Å            | C17–Re1–C18 | 88.7(3)°             |
| C18–O3  | 1.142(9) Å            | C16–Re1–C18 | 88.1(3)°             |



**Table S10:** Crystallographic data of *fac*-[Re( $\kappa^2$ -terpy)(CO)<sub>3</sub>(PO<sub>2</sub>F<sub>2</sub>)] [9].

|                                                |                                                                                                                                         |
|------------------------------------------------|-----------------------------------------------------------------------------------------------------------------------------------------|
| Empirical formula                              | C <sub>36</sub> H <sub>22</sub> Br <sub>0.26</sub> F <sub>3.48</sub> N <sub>6</sub> O <sub>9.48</sub> P <sub>1.74</sub> Re <sub>2</sub> |
| Formula weight                                 | 678.71                                                                                                                                  |
| Diffractometer                                 | Rigaku OD XtaLAB Synergy, Dualflex, Pilatus 200K                                                                                        |
| Radiation                                      | CuK $\alpha$ ( $\lambda$ = 1.54184 Å)                                                                                                   |
| Temperature [K]                                | 160                                                                                                                                     |
| Crystal system                                 | triclinic                                                                                                                               |
| Space group                                    | $P_1$                                                                                                                                   |
| a [Å]                                          | 8.4380 (2)                                                                                                                              |
| b [Å]                                          | 9.6908 (2)                                                                                                                              |
| c [Å]                                          | 27.1602 (4)                                                                                                                             |
| $\alpha$ [°]                                   | 96.4300 (10)                                                                                                                            |
| $\beta$ [°]                                    | 97.0310 (10)                                                                                                                            |
| $\gamma$ [°]                                   | 104.920 (2)                                                                                                                             |
| Volume [Å <sup>3</sup> ]                       | 2105.92 (8)                                                                                                                             |
| Z                                              | 2                                                                                                                                       |
| $\rho_{\text{calc}}$ [g/cm <sup>3</sup> ]      | 1.898                                                                                                                                   |
| $\mu$ [mm <sup>-1</sup> ]                      | 12.643                                                                                                                                  |
| F(000)                                         | 1145.0                                                                                                                                  |
| Crystal size [mm <sup>3</sup> ]                | 0.12 × 0.072 × 0.018                                                                                                                    |
| Crystal description                            | plate, yellow                                                                                                                           |
| 2 $\theta$ range for data collection [°]       | 6.632 to 147.798                                                                                                                        |
| Index ranges                                   | -10 ≤ h ≤ 10, -11 ≤ k ≤ 12, -33 ≤ l ≤ 31                                                                                                |
| Reflections collected                          | 53308                                                                                                                                   |
| Independent reflections                        | 8152 [ $R_{\text{int}}$ = 0.0663, $R_{\text{sigma}}$ = 0.0276]                                                                          |
| Reflections observed                           | 7569                                                                                                                                    |
| Criterion for observation                      | I > 2 $\sigma$ (I)                                                                                                                      |
| Completeness to theta                          | 99.8% to 73.899°                                                                                                                        |
| Absorption correction                          | gaussian                                                                                                                                |
| Min./max. transmission                         | 0.535/1.000                                                                                                                             |
| Data/restraints/parameters                     | 8152/1/551                                                                                                                              |
| Goodness-of-fit on F <sup>2</sup>              | 1.074                                                                                                                                   |
| Final R indexes [I >= 2 $\sigma$ (I)]          | $R_1$ = 0.0415, $wR_2$ = 0.1047                                                                                                         |
| Final R indexes [all data]                     | $R_1$ = 0.0442, $wR_2$ = 0.1066                                                                                                         |
| Largest diff. peak/hole / [e Å <sup>-3</sup> ] | 1.33/-2.64                                                                                                                              |

Note: The unit cell contains both isomers, but only one is shown in Figure S36. The PO<sub>2</sub>F<sub>2</sub><sup>-</sup> counterion is disordered with Br<sup>-</sup> at an occupancy of 0.13.

## 5.6 *fac*-[Tc( $\kappa^2$ -terpy)(CO)<sub>3</sub>Cl], [11]

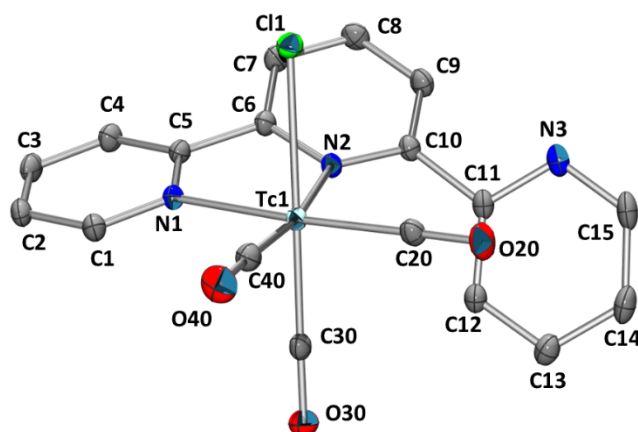

**Figure S37:** Ellipsoid displacement plot<sup>[15]</sup> of *fac*-[Tc( $\kappa^2$ -terpy)(CO)<sub>3</sub>Cl] [11]. Ellipsoids represent 35% probability. Hydrogen atoms are omitted for clarity.

**Table S11:** Tabulated values of selected bond lengths and angles in the crystal structure of [11].

|         | Selected bond lengths |             | Selected bond angles |
|---------|-----------------------|-------------|----------------------|
| Tc1–N1  | 2.1779(12) Å          | N1–Tc1–N2   | 75.09(5)°            |
| Tc1–N2  | 2.2378(12) Å          | N1–Tc1–C20  | 175.97(5)°           |
| Tc1–C20 | 1.9248(16) Å          | N1–Tc1–C30  | 92.80(5)°            |
| Tc1–C30 | 1.8901(16) Å          | N1–Tc1–C40  | 97.72(6)°            |
| Tc1–C40 | 1.9124(16) Å          | N1–Tc1–Cl1  | 85.99(3)°            |
| Tc1–Cl1 | 2.5040(4) Å           | N2–Tc1–Cl1  | 82.53(3)°            |
| C20–O20 | 1.1453(19) Å          | C20–Tc1–C30 | 89.10(6)°            |
| C30–O30 | 1.146(2) Å            | C30–Tc1–C40 | 88.32(7)°            |
| C40–O40 | 1.143(2) Å            | C20–Tc1–C40 | 85.88(7)°            |

**Table S12:** Crystallographic data of *fac*-[Tc( $\kappa^2$ -terpy)(CO)<sub>3</sub>Cl] [11].

|                                                |                                                                    |
|------------------------------------------------|--------------------------------------------------------------------|
| Empirical formula                              | C <sub>18</sub> H <sub>11</sub> ClN <sub>3</sub> O <sub>3</sub> Tc |
| Formula weight                                 | 450.75                                                             |
| Diffractometer                                 | <i>Rigaku XtaLAB Synergy, Dualflex, HyPix</i>                      |
| Radiation                                      | MoK $\alpha$ ( $\lambda = 0.71073$ Å)                              |
| Temperature [K]                                | 160                                                                |
| Crystal system                                 | monoclinic                                                         |
| Space group                                    | <i>I2/a</i>                                                        |
| a [Å]                                          | 16.6643 (3)                                                        |
| b [Å]                                          | 7.04490 (10)                                                       |
| c [Å]                                          | 29.6513 (6)                                                        |
| $\alpha$ [°]                                   | 90                                                                 |
| $\beta$ [°]                                    | 102.168 (2)                                                        |
| $\gamma$ [°]                                   | 90                                                                 |
| Volume [Å <sup>3</sup> ]                       | 3402.81 (11)                                                       |
| Z                                              | 8                                                                  |
| $\rho_{\text{calc}}$ [g/cm <sup>3</sup> ]      | 1.760                                                              |
| $\mu$ [mm <sup>-1</sup> ]                      | 1.027                                                              |
| F(000)                                         | 1792.0                                                             |
| Crystal size [mm <sup>3</sup> ]                | 0.57 × 0.41 × 0.1                                                  |
| Crystal description                            | plate, green                                                       |
| 2 $\Theta$ range for data collection [°]       | 5.002 to 59.144                                                    |
| Index ranges                                   | -21 ≤ h ≤ 21, -9 ≤ k ≤ 9, -40 ≤ l ≤ 36                             |
| Reflections collected                          | 24908                                                              |
| Independent reflections                        | 4254 [ $R_{\text{int}} = 0.0221$ , $R_{\text{sigma}} = 0.0157$ ]   |
| Reflections observed                           | 4032                                                               |
| Criterion for observation                      | I > 2 $\sigma$ (I)                                                 |
| Completeness to theta                          | 99.9% to 29.6630°                                                  |
| Absorption correction                          | gaussian                                                           |
| Min./max. transmission                         | 0.224/1.000                                                        |
| Data/restraints/parameters                     | 4254/0/235                                                         |
| Goodness-of-fit on F <sup>2</sup>              | 1.069                                                              |
| Final R indexes [I ≥ 2 $\sigma$ (I)]           | R <sub>1</sub> = 0.0190, wR <sub>2</sub> = 0.0473                  |
| Final R indexes [all data]                     | R <sub>1</sub> = 0.0204, wR <sub>2</sub> = 0.0479                  |
| Largest diff. peak/hole / [e Å <sup>-3</sup> ] | 0.51/-0.37                                                         |

## 6. References

- [1] R. Alberto, R. Schibli, A. Egli, A. P. Schubiger, U. Abram, T. A. Kaden, *J. Am. Chem. Soc.* **1998**, *120*, 7987–7988.
- [2] R. Lengacher, Y. Wang, H. Braband, O. Blacque, G. Gasser, R. Alberto, *Chem. Commun.* **2021**, *57*, 13349–13352.
- [3] R. Alberto, A. Egli, U. Abram, K. Hegetschweiler, V. Gramlich, A. P. Schubiger, *J. Chem. Soc. Dalt. Trans.* **1994**, 2815–2820.
- [4] R. Alberto, R. Schibli, A. Egli, W. A. Herrmann, G. Artus, U. Abram, T. A. Kaden, *J. Organomet. Chem.* **1995**, *492*, 217–224.
- [5] Z. Li, T. M. Rayder, L. Luo, J. A. Byers, C. K. Tsung, *J. Am. Chem. Soc.* **2018**, *140*, 8082–8085.
- [6] R. C. Clark, J. S. Reid, *Acta Crystallogr. Sect. A* **1995**, *51*, 887–897.
- [7] “CrysAlisPro (version 1.171.40.68a), Rigaku Oxford Diffraction,” **2019**.
- [8] O. V. Dolomanov, L. J. Bourhis, R. J. Gildea, J. A. K. Howard, H. Puschmann, *J. Appl. Crystallogr.* **2009**, *42*, 339–341.
- [9] G. M. Sheldrick, *Acta Crystallogr. Sect. A* **2015**, *71*, 3–8.
- [10] G. M. Sheldrick, *Acta Crystallogr. Sect. C* **2015**, *71*, 3–8.
- [11] A. L. Spek, *Acta Crystallogr. Sect. C* **2015**, *71*, 9–18.
- [12] M. L. Besmer, H. Braband, T. Fox, B. Spingler, A. P. Sattelberger, R. Alberto, *Inorg. Chem.* **2023**, *62*, 10727–10735.
- [13] H.-O. Kalinowski, S. Berger, S. Braun, *<sup>13</sup>C-NMR-Spektroskopie*, Thieme, New York, **1984**.
- [14] E. W. Abel, V. S. Dimitrov, N. J. Long, K. G. Orrell, A. G. Osborne, H. M. Pain, V. Sik, M. B. Hursthouse, M. A. Mazide, *J. Chem. Soc. Dalt. Trans.* **1993**, 597–603.
- [15] L. J. Farrugia, *J. Appl. Crystallogr.* **1997**, *30*, 565–565.
